# 1 Synergistic CDK control pathways maintain cell size homeostasis

2

3 James O. Patterson<sup>1,2\*</sup>, Souradeep Basu<sup>1</sup>, Paul Rees<sup>2,3</sup> and Paul Nurse<sup>1,4</sup>

4

## 5 **Affiliations**

6 **1** Cell Cycle Laboratory, The Francis Crick Institute, 1 Midland Road, London, NW1 1ST, UK.

7 **2** College of Engineering, Swansea University, Fabian Way, Swansea, SA1 8EN, UK.

8 **3** Imaging Platform, Broad Institute of Harvard and MIT, 415 Main Street, Cambridge, MA

9 02142, USA.

10 **4** Laboratory of Yeast Genetics and Cell Biology, Rockefeller University, 1230 York Ave, New

11 York, NY 10065, USA.

12 \*Correspondence to [jamesop@gmail.com](mailto:jamesop@gmail.com)

13

## 14 **Abstract**

15 To coordinate cell size with cell division, cell size must be computed by the cyclin-CDK  
16 control network to trigger division appropriately. Here we dissect determinants of cyclin-  
17 CDK activity using a novel high-throughput single-cell in vivo system. We show that  
18 inhibitory phosphorylation of CDK encodes cell size information and works synergistically  
19 with PP2A to prevent division in smaller cells. However, even in the absence of all canonical  
20 regulators of cyclin-CDK, small cells with high cyclin-CDK levels are restricted from dividing.  
21 We find that diploid cells of equivalent size to haploid cells exhibit lower CDK activity in  
22 response to equal cyclin-CDK enzyme concentrations, suggesting that CDK activity is  
23 reduced by DNA concentration. Thus, multiple pathways directly regulate cyclin-CDK activity  
24 to maintain robust cell size homeostasis.

25

26

27

28

29

30

31

32

33 **Main**

34 Cells display homeostatic behavior in maintaining population cell size by controlling cell size  
35 at cell division. This homeostasis is thought to be driven by ensuring that larger cells are  
36 more likely to divide than smaller cells, resulting in the correction of any cell size deviances  
37 at cell division<sup>1</sup>. Cyclin dependent kinase (CDK<sup>Cdc2</sup>) is the master regulator of the eukaryotic  
38 cell cycle, and therefore the propensity for smaller cells not to divide must feed into the  
39 regulation of cyclin-CDK<sup>2</sup>. CDK is subject to several mechanisms of control: cyclin synthesis,  
40 and subsequent binding to CDK drives CDK into a catalytically competent form<sup>3</sup>; Wee1  
41 kinase and Cdc25 phosphatase act to inhibit or activate CDK respectively through regulatory  
42 tyrosine phosphorylation<sup>4,5</sup>; and PP2A phosphatase works to remove phosphates deposited  
43 by CDK, effectively reducing its activity<sup>6</sup>.

44

45 Much of the data about CDK regulation has been acquired *in vitro*<sup>7-11</sup>, and the quantitative  
46 influence of the known regulatory mechanisms *in vivo* has been less studied. Thus, it  
47 remains unclear how cell size information feeds into this regulatory network to prevent  
48 smaller cells from division, and thus maintain size homeostasis.

49

50 Given the complexity of the CDK regulatory network, we used fission yeast cells containing a  
51 reduced CDK control system with the cell cycle being driven by a monomeric cyclin-CDK  
52 fusion-protein (C-CDK)<sup>2</sup>. This simplifies the network by eliminating cyclin binding to CDK as a  
53 regulatory component, and by allowing co-expression of both cyclin and CDK from a single  
54 promoter. Using this system, inhibitory Wee1-dependent phosphoregulation can also be  
55 removed using a non-phosphorylatable C-CDK<sup>AF</sup> mutant. These C-CDK<sup>AF</sup> strains are viable,  
56 co-ordinate cell division with cell growth, and maintain cell-size homeostasis (Fig. 1a)<sup>12</sup>.

57

58 To examine the relationship between cell size, C-CDK concentration, and mitosis, we  
59 performed quantitative fluorescence time-lapse microscopy on strains expressing  
60 fluorescently tagged C-CDK<sup>WT</sup> and C-CDK<sup>AF</sup> (Fig 1a-e, Fig. S1a). This analysis showed robust  
61 oscillations of C-CDK<sup>WT</sup> and C-CDK<sup>AF</sup>, with degradation of C-CDK occurring just before cell  
62 division (Fig. 1b). C-CDK<sup>AF</sup> oscillations were more variable, and 5% of C-CDK<sup>AF</sup> cells trigger C-  
63 CDK degradation in the absence of division (Fig. S1), similar to what has been observed in  
64 CDK1<sup>AF</sup> expressing human cells<sup>13</sup>. In both backgrounds, C-CDK concentration scaled with cell

65 size, with C-CDK<sup>WT</sup> exhibiting a higher amount of C-CDK to enter mitosis compared to C-  
66 CDK<sup>AF</sup> (Fig. 1c). On investigating the links between the probability of a given cell to divide,  
67 cell size, and C-CDK level, we found that for C-CDK<sup>WT</sup> both cell size and C-CDK level reach  
68 sharp thresholds at which cell division rates increase (Fig. 1d,e). In the absence of tyrosine  
69 phosphorylation, a sharp threshold for C-CDK<sup>AF</sup> level still exists (Fig. 1e), but is at a lower  
70 level than C-CDK<sup>WT</sup>. C-CDK<sup>AF</sup> cells fail to generate a sharp threshold for cell size, but even  
71 without a clear size threshold C-CDK<sup>AF</sup> cells still restrict smaller cells from division (Fig. 1d).

72

73 C-CDK level is not a direct measure of C-CDK activity because of the multiple regulatory  
74 networks affecting CDK<sup>8</sup>. To investigate CDK activity, cell size, and C-CDK level at the same  
75 time we developed an *in vivo* single-cell assay of CDK activity. We used Cut3, the Smc4  
76 homolog, as a CDK activity biosensor, as it translocates from the cytoplasm into the nucleus  
77 upon CDK-dependent phosphorylation of a single site in its N-terminus (Fig. 1f)<sup>14</sup>. Thus, the  
78 Cut3 nuclear/cytoplasmic (N/C) ratio can be used to assess CDK activity, a method that has  
79 been applied to other protein kinases<sup>15,16</sup>. As a test of this assay, we blocked cells expressing  
80 fluorescently tagged Cut3 in the background of a bulky ATP-analogue sensitive C-CDK<sup>2</sup> using  
81 1NM-PP1, and tracked single cells following their release from G2 arrest into a range of  
82 1NM-PP1 doses (Fig. 1g, Fig. S2). The response of the maximum nuclear Cut3 concentration  
83 to 1NM-PP1 was similar to the one measured in our previous phosphoproteomics study<sup>17</sup>,  
84 confirming that our sensor reflects *in vivo* CDK activity (Fig. 1h). Given that our sensor reads  
85 *in vivo* CDK activity, we examined CDK activity in unperturbed cells. CDK activity, as  
86 measured by the Cut3 N/C ratio, rises to a higher level in C-CDK<sup>WT</sup> cells in comparison to C-  
87 CDK<sup>AF</sup> cells, and progress through mitosis in C-CDK<sup>AF</sup> cells is slower and more variable (Fig.  
88 1i, Fig. S3).

89

90 We next investigated the links between C-CDK protein levels, CDK activity, and cell size in C-  
91 CDK<sup>WT</sup> and C-CDK<sup>AF</sup> cells, beyond their physiological cell lengths. During the G2/M block (Fig.  
92 1g), cell size and C-CDK enzyme concentration scaled with each other in both backgrounds  
93 (Fig. 1j,k). After the release from CDK inhibition, C-CDK<sup>WT</sup> activity correlated well with both  
94 cell size and C-CDK protein level (Fig. 1l,n). However, peak C-CDK<sup>AF</sup> activity correlated better  
95 with protein level than with cell size (Fig. 1m,o). When conducting this experiment using a  
96 high throughput assay (Fig. S4, Fig. S5) we observed similar behavior, but this approach

97 clearly illustrated that peak CDK activity in both C-CDK<sup>AF</sup> and C-CDK<sup>WT</sup> was heavily size  
98 dependent (Fig. S4e). Therefore, CDK tyrosine phosphorylation helps to inform the cell  
99 division machinery of size (Fig. 1d,l). However, in the absence of tyrosine phosphorylation,  
100 C-CDK<sup>AF</sup> cells are still able to generate a threshold C-CDK level for division and show size-  
101 dependent CDK activity scaling (Fig. 1e,m,o). Thus, they are still able to restrict small cells  
102 from dividing.

103

104 A complication of the above assay is that cell size scales with C-CDK level<sup>2,18,19</sup> (Fig. 1c, j, k).  
105 To uncouple cell size from C-CDK level, and study if small cells are prevented from entering  
106 mitosis due to low C-CDK level or for some other reason, we developed a more flexible  
107 single cell CDK assay system. This assay was also based on Cut3 translocation into the  
108 nucleus (Fig. 2a) but uses a brighter synthetic C-CDK activity sensor, synCut3-mCherry to  
109 allow its co-detection with C-CDK in a high-throughput assay (Fig. S6). This sensor was  
110 expressed in a strain where the endogenous CDK network can be switched off using a  
111 temperature sensitive CDK1 allele, *cdc2<sup>TS</sup>*. A tetracycline-inducible fluorescently-tagged C-  
112 CDK was constructed which was made non-degradable<sup>20</sup> and sensitive to inhibition by 1NM-  
113 PP1. Induction of C-CDK at the *cdc2<sup>TS</sup>* restrictive temperature allows the study of the activity  
114 of the inducible C-CDK without either wild-type CDK activity or C-CDK proteolysis during.  
115 Using this assay, we acquired hundreds of thousands of images of single cells, which allowed  
116 us to study the *in vivo* biochemistry of CDK activity in response to a wide range of C-CDK  
117 concentrations, in physiologically-sized cells. C-CDK level was uncoupled from cell size as  
118 induction of C-CDK was not dependent on cell size (Fig. 2b,c). Results from this assay  
119 demonstrated that *in vivo* CDK activity was dependent on C-CDK level, and was reduced  
120 when CDK activity was inhibited using 1NM-PP1 (Fig. 2d) (Fig. S7).

121

122 Combining this system it with genetic backgrounds in which canonical C-CDK regulation was  
123 absent, we analysed how mechanisms of CDK regulation affected C-CDK activity in relation  
124 to cell size. We performed the assay in backgrounds lacking PP2A, inhibitory CDK tyrosine  
125 phosphorylation, or both (Fig. 2e). C-CDK levels increased similarly upon induction in all  
126 mutant backgrounds (Fig. 2f). Population mean C-CDK activity was comparable between all  
127 conditions (Fig. 2g), however displayed striking differences at the single-cell level when CDK  
128 activity was measured in cells of different sizes. In all genetic backgrounds, at the same level

129 of C-CDK enzyme, maximum C-CDK activity increases with cell size (Fig. 2h). This is  
130 particularly noticeable when directly comparing the maximum C-CDK activity of cells with C-  
131 CDK level of ~750 AU in the 8  $\mu\text{m}$  bin to the 14  $\mu\text{m}$  bin in all backgrounds (Fig. 2h, dashed  
132 lines). The single cell dose-response of CDK activity on C-CDK concentration in a wild-type  
133 background is clearly bistable, with cells existing in either an 'on' or an 'off' state. The C-CDK  
134 concentration required to switch cells "on" decreases with increasing cell size, and the  
135 sharpness of the transition increases with size (Fig. 2h,j). This bistable behavior is heavily  
136 dependent on CDK tyrosine phosphorylation (Fig. 2h,j,k). Removal of PP2A allows the  
137 attainment of the "on" state at lower cell sizes (Fig. 2h), effectively shifting the C-CDK dose  
138 response curve towards lower sizes without altering the shape of the response (Fig. 2j). In  
139 addition, PP2A also adds switch like behavior to the C-CDK activity dose-response, as  
140 bistable behavior present with C-CDK<sup>AF</sup> is not present with C-CDK<sup>AF</sup> PP2A $\Delta$  (Fig. 2h dashed  
141 box, inset and 2k).

142

143 When looking across all size bins, maximum C-CDK activity increases with cell size in all  
144 genetic backgrounds, but plateaus at about 12-13  $\mu\text{m}$  in the absence of tyrosine  
145 phosphorylation (Fig. 2i). However, it is clear that cell size is able to regulate C-CDK activity  
146 even in the absence of both tyrosine phosphorylation and PP2A (Fig. 2h,i). These results are  
147 consistent with our previous observations (Fig. 1), that although tyrosine phosphorylation  
148 has a role in informing the cell cycle machinery of size, small cells are still restricted from  
149 mitosis even in the absence of tyrosine phosphorylation.

150

151 PP2A and inhibitory tyrosine phosphorylation constitute two fundamentally different modes  
152 of lowering CDK activity, however it is unknown if they act independently or synergistically  
153 to do so. We therefore sought to calculate the individual contributions of PP2A and tyrosine  
154 phosphorylation in restricting CDK activity in order to examine if their combined  
155 contribution was greater than the sum of their parts. To calculate the individual  
156 contributions of tyrosine phosphorylation and PP2A in restricting C-CDK activity, first we  
157 measured the threshold C-CDK level required for 50% of cells to reach a C-CDK activity >5 in  
158 different strain backgrounds within different size bins (Fig. 3a). This value was chosen as an  
159 approximate value of the C-CDK concentration required *in vivo* to trigger mitotic entry in  
160 wild-type cells (Fig. 1i). When this C-CDK threshold level was plotted across all size bins (Fig.

161 3b) the threshold was seen to be size dependent in all strain backgrounds, with wild-type  
162 cells exhibiting the strongest capacity to raise the C-CDK level threshold for mitosis in  
163 smaller cells. By subtracting the curves of cell length vs. mitotic C-CDK level (Fig. 3c) for  
164 various backgrounds we were able to estimate the individual contribution of tyrosine  
165 phosphorylation and PP2A in a given background. For example, C-CDK<sup>WT</sup> PP2AΔ – C-CDK<sup>AF</sup>  
166 PP2AΔ, estimates the ability of tyrosine phosphorylation alone to restrict mitotic entry in a  
167 background lacking PP2A. PP2A is able to restrict cells with 600 units of C-CDK from entering  
168 mitosis at 8 μm cell length, but only 200 units of C-CDK at 10 μm (Fig. 3c, yellow). If the  
169 different components of the CDK control network act separately, adding individual  
170 threshold contributions together would generate a threshold curve similar to the wild-type  
171 curve. However, when the individual contributions of tyrosine phosphorylation and PP2A,  
172 were added to the C-CDK<sup>AF</sup> PP2AΔ curve, they did not recapitulate the wild-type curve (Fig.  
173 3d). Thus, this analysis demonstrates that there is synergy between the tyrosine  
174 phosphorylation network and PP2A activity, and that this synergy is important for  
175 establishing the C-CDK level threshold for division.

176

177 We have shown that small cells are normally prevented from division by their low C-CDK  
178 protein level (Fig. 1) along with PP2A and tyrosine phosphorylation working synergistically  
179 to increase the level of C-CDK needed to trigger division in smaller cells (Fig. 3). Strikingly  
180 however, in the absence of these canonical regulators, small cells are still able to restrict  
181 division by lowering CDK activity as a result of some other factor related to cell size (Fig.  
182 2h,i,j). This unknown factor is able to lower CDK activity in small cells despite high C-CDK  
183 levels, thus restricting them from division (Fig 2i).

184

185 Given the positive relationship between maximum C-CDK activity and increasing cell size in  
186 the C-CDK<sup>AF</sup> PP2AΔ mutant (Fig. 2i), we hypothesized that a titration based model might be  
187 operative, where cells dilute a CDK inhibitor as they grow<sup>21</sup>. Given that cell size is linked to  
188 ploidy through an unknown mechanism, we tested whether DNA concentration could  
189 influence CDK activity, and therefore constitute the unknown factor able to lower C-CDK  
190 activity in small cells. We induced C-CDK<sup>AF</sup> in haploid and diploid variants of the C-CDK<sup>AF</sup>  
191 PP2AΔ strain, thereby eliminating all major canonical CDK regulation at mitosis (Fig. 4a,b).  
192 Strikingly, diploid cells exhibited lower C-CDK activity in response to the same C-CDK enzyme

193 concentration as haploids (Fig. 4c). The EC50 of the diploid dose response curve was almost  
194 double that of the haploid (Fig. 4d). Looking at single-cell, volume-resolved data, the  
195 inhibition of C-CDK activity is most marked in smaller diploid cells, with larger diploid cells  
196 having almost indistinguishable dose-response curves from their haploid equivalents (Fig.  
197 4e). The effect of cell size on CDK activation is much less marked in these larger than normal  
198 haploids (Fig. 4f). The diploids, which feature cells of physiological diploid size, still  
199 experience DNA concentration dependent inhibition of their CDK activity. The effect of  
200 equal C-CDK levels resulting in lower C-CDK activity in small diploids when compared to  
201 equivalent haploids is readily seen from raw images (Fig. 4g). Therefore, in search of  
202 additional C-CDK regulation we show that cells of different ploidies, but otherwise  
203 equivalent volume, experience variable C-CDK activity in response to equal C-CDK level. This  
204 suggests that even in the absence of all canonical CDK regulation, DNA itself is able to lower  
205 CDK activity to prevent division in small cells. This regulation appears to operate in a  
206 titration-based manner, as at higher volumes this inhibition of CDK activity disappears.

207

208 Our approach has demonstrated that three mechanisms contribute to cell size homeostasis  
209 through CDK activity control: C-CDK enzyme concentration scaling, synergistic PP2A and  
210 tyrosine-phosphorylation dependent C-CDK threshold scaling, and DNA concentration  
211 dependent inhibition of C-CDK enzyme activity. Our results demonstrate that C-CDK activity  
212 vs. C-CDK level dose-response curves previously demonstrated *in vitro* operate *in vivo*, but  
213 in addition we show they are strongly dependent on cell size *in vivo*. We also demonstrate a  
214 direct link between ploidy and CDK activity, thus suggesting an explanation for why cell size  
215 is linked to ploidy universally across cell types<sup>22–26</sup>. Finally, we show that tyrosine  
216 phosphorylation, PP2A activity, and DNA dependent inhibition of CDK activity act together  
217 to restrict small cells from division, forming a mechanism to generate the robust cell size  
218 threshold behavior observed in normal cells. Cancers often exhibit increased variability in  
219 their cell size at division<sup>27</sup>, and further work on which of the three cell size control  
220 mechanisms are lost within these tumors could provide a route into developing synthetic  
221 lethal approaches by inhibition of the remaining active pathways.

222

223

224 **Methods:**

225 ***S. pombe genetics and cell culture***

226 *S. pombe* media and standard methods are as previously described<sup>28</sup>. After nitrogen and  
227 glucose addition, EMM was filter sterilised. This process allows for the generation of clear  
228 un-caramelised media. Nutritional supplements for auxotrophic yeast strains were added at  
229 a concentration of 0.15 mg/ml. Temperature-sensitive mutant strains were grown at  
230 temperatures as specified in the text. The temperature-sensitive allele of Cdc2 used was  
231 Cdc2-M26. To modulate inducible promoters, anhydrotetracycline (Sigma) in DMSO at  
232 specified concentrations was added to 0.03125 µg/ml final concentration unless otherwise  
233 specified. To alter Cdc2(as) activity, 1NM-PP1 diluted in DMSO was used at concentrations  
234 specified in the text. To stain for septa, calcofluor (Fluorescent Brightener 28 (Sigma  
235 Aldrich)) was made up in water at 1 g/L and used as 500x stock. Bortezomib was added to  
236 cultures to inhibit the C-CDK degradation, as described previously<sup>29</sup>. SynCut3 was  
237 constructed by Gibson assembly of a codon optimised fragment consisting of the first 528  
238 amino acids of Cut3, a linker region, and a fluorescent protein (mCherry or mNeongreen).  
239 YFP was tagged onto C-CDK at the C-terminus of the protein. Where the sfGFP labelled C-  
240 CDK was used, the sfGFP was present internally within the Cdc13 component<sup>29</sup>. Cut3-  
241 mCherry was generated by C-terminal tagging<sup>30</sup> and Cut3-GFP was developed previously<sup>14</sup>.  
242 Details of the TetR promoter and linearised variants can be found in a previous publication<sup>1</sup>.

243

244 ***Imaging flow cytometry***

245 Imaging flow cytometry was performed using an Imagestream Mark X two-camera system  
246 (Amnis), using the 60x objective. Cells were concentrated by centrifugation (5000 rpm/30  
247 seconds) and resuspended in ~25 µl of media before sonication in a sonicating water bath.



248 1. Gradient RMS>65 (a measure of cell focus).

249 2. Area/Aspect ratios consistent with single cells.

250 To avoid any autofocus based drift within an experiment, cell were imaged at fixed,  
251 empirically determined focal points, designed to maximise the number of cells with gradient  
252 RMS>65. Data was analysed using custom Matlab scripts.

253

254 To perform time-lapse imaging flow cytometry, water baths at specified temperatures for  
255 the experiment were set up with cultures next to the IMS. Time was measured from the  
256 point of drug addition to liquid culture or as described during a wash protocol for drug  
257 release. Samples were collected as above from the waterbath, and sample time-points  
258 defined as the time at which acquisition on the IMS began (as opposed to time when sample  
259 was collected – although this was consistently ~3 minutes apart). Samples were imaged for  
260 ~1 minute unless otherwise stated.

261

### 262 ***Microscopic imaging***

263 All imaging was performed using a Deltavision Elite (Applied Precision) microscope – an  
264 Olympus IX71 wide-field inverted fluorescence microscope with a PLAN APO 60x oil, 1.42 NA  
265 objective and a Photometrics CoolSNAP HQ2 camera. To maintain specified temperatures  
266 during imaging, an IMSOL incubator Environment control system and an objective heater  
267 was used. SoftWoRx was used to set up experiments. 5 z-stacks were acquired, with 1  $\mu\text{m}$   
268 spacing. Image analysis was performed using custom Matlab scripts.

269

270 The ONIX Microfluidics platform allows for long-term time-lapse imaging of live cells. Plate  
271 details can be found at [http://www.cellasic.com/ONIX\\_yeast.html](http://www.cellasic.com/ONIX_yeast.html). 50  $\mu\text{l}$  of cell culture at

272 density  $1.26 \times 10^6$ /ml was loaded into the plate, and imaged in the 3.5  $\mu\text{m}$  chamber. Cells  
273 were loaded at 8 psi for 5 seconds. Media was perfused at a flow rate of 3 psi. The imaging  
274 chamber was washed with media for 1 minute at 5 psi before cells were loaded.

275

276 Mattek glass bottom dishes were used for some time-lapse imaging applications with drugs  
277 that were incompatible with Cellasics plates, primarily for the purpose of release from a  
278 1NM-PP1/Cdc2(as) cell cycle block. Dishes were pre-treated with soybean lectin to permit  
279 cell adherence (Sigma Aldrich). Before addition of cells Mattek dishes were pre-warmed on  
280 a heatblock at appropriate temperature. Cells were grown and blocked in liquid culture  
281 before 2 ml were pelleted (5000 rpm/30 seconds). Cell pellets were then pooled and  
282 resuspended in 1 ml of release media (at which time a stop watch was started) in a new  
283 microcentrifuge tube before pelleting (5000 rpm/30 seconds) and resuspended in 5  $\mu\text{l}$  of  
284 media. This concentrated cell suspension was then applied to the centre of the Mattek dish,  
285 and allowed to settle for  $\sim 5$  seconds. The dish was then washed with 1 ml of release media  
286 3x. The dish was then filled with 3 ml of release media before rapid imaging. In general the  
287 wash process requires 1.5 minutes, and imaging setup requires 5 minutes for  $\sim 8$  FOV.

288

## 289 **Data analysis and plotting**

### 290 ***Boxplots***

291 The top of box is the 25th percentile of the data, the bottom is the 75th percentile. The line  
292 in the middle of the box is the median. Whisker lengths are either the distance to the  
293 furthest point outside of the box, or 1.5x the interquartile range, whichever is lower. If data  
294 exists that is greater than 1.5x the interquartile range from the top or bottom of the box,  
295 this is shown as a red “+”.

296

297 **Statistical testing**

298 Statistical testing was performed where appropriate using a two tailed two sample t-test. P  
299 values below 0.05 were considered significant. Replicates are shown where appropriate by  
300 N numbers.

301 **Cell size measurement**

302 Cell size was measured by three different metrics. In timelapse microscopy assays, cell size  
303 was determined as the area of the 2D surface segmented by our segmentation algorithm. In  
304 the high-throughput imagestream assays, cell size was measured as length of the cell. The  
305 difference in metric choice between these two systems was due to improved ability of  
306 measuring cell length in the high-throughput assay, where it was less affected by focal  
307 dependent changes in cell volume. In the haploid vs. diploid experiments, a measure of cell  
308 volume was used, where cells were assumed to behave as cylinders, and volume was  
309 calculated from the measured radius and length. This was done as diploids are wider than  
310 haploids and thus a simple length metric cannot be employed for size binning.

311 **Strain table:**

| Strain ID | Strain genotype                                                                                                         | Source    |
|-----------|-------------------------------------------------------------------------------------------------------------------------|-----------|
| JP223     | h? leu1::cdc13P:cdc13-cdc2.as-YFP:cdc13T::ura4 cdc13Δ::natMX6 cdc2::scLeu2                                              | This work |
| JP224     | h? leu1::cdc13P:cdc13-cdc2AF.as-YFP:cdc13T::ura4 cdc13Δ::natMX6 cdc2::scLeu2                                            | This work |
| JP670     | h? leu1::cdc13P:cdc13-cdc2.as-YFP:cdc13T::ura4 cdc13Δ::natMX6 cdc2::scLeu2 ura4::Ppcna1-CFP-pcna cut3-mCherry::hphMX6   | This work |
| JP671     | h? leu1::cdc13P:cdc13-cdc2AF.as-YFP:cdc13T::ura4 cdc13Δ::natMX6 cdc2::scLeu2 ura4::Ppcna1-CFP-pcna cut3-mCherry::hphMX6 | This work |
| JP310     | h? leu1::cdc13P:cdc13-cdc2.as:cdc13T::ura4                                                                              | This work |

|       |                                                                                                                       |           |
|-------|-----------------------------------------------------------------------------------------------------------------------|-----------|
|       | cdc13Δ::natMX6 cdc2::scLeu2 cut3-tdTomato::hphMX6                                                                     |           |
| JP311 | h? leu1::cdc13P:cdc13-cdc2AF.as:cdc13T::ura4 cdc13Δ::natMX6 cdc2::scLeu2 cut3-tdTomato::hphMX6                        | This work |
| JP295 | h? leu1::cdc13P:cdc13-cdc2AF.as:cdc13T::ura4 cdc13Δ::natMX6 cdc2::scLeu2 cut3-GFP::ura4                               | This work |
| JP296 | h? leu1::cdc13P:cdc13-cdc2.as:cdc13T::ura4 cdc13Δ::natMX6 cdc2::scLeu2 cut3-GFP::ura4                                 | This work |
| JP501 | h? cdc2.as::blastMX6 synCut3-mNeogreen:: leu1+                                                                        | This work |
| JP507 | h? cdc2.as::blastMX6 synCut3-T19V-mNeogreen:: leu1+                                                                   | This work |
| JP601 | h? synCut3-mCherry:: leu1+ cut3-GFP::ura4                                                                             | This work |
| JP602 | h? cdc2.as::blastMX6 synCut3-mCherry::leu1+ cut3-GFP::ura4                                                            | This work |
| JP591 | h? cdc2-M26 synCut3-mCherry::leu1+ leu1::enoTetP:cdc13-sfGFP-cdc2.as:adh1T::hphMX6 TetR1                              | This work |
| JP593 | h? cdc2-M26 synCut3-mCherry::leu1+ leu1::enoTetP:cdc13-sfGFP-cdc2AF.as:adh1T::hphMX6 TetR1                            | This work |
| JP603 | h? cdc2-M26 synCut3-mCherry::leu1+ leu1::enoTetP:DBΔcdc13-sfGFP-cdc2.as:adh1T::hphMX6 TetR1                           | This work |
| JP605 | h? cdc2-M26 synCut3-mCherry::leu1+ (JPp178) leu1::enoTetP:DBΔcdc13-sfGFP-cdc2AF.as:adh1T::hphMX6 TetR1                | This work |
| JP679 | h? cdc2-M26::blastMX6 synCut3-mCherry::leu1+ leu1::enoTetP:DBΔcdc13-sfGFP-cdc2.as:adh1T::hphMX6 TetR1 PP2AΔ::kanMX6   | This work |
| JP680 | h? cdc2-M26::blastMX6 synCut3-mCherry::leu1+ leu1::enoTetP:DBΔcdc13-sfGFP-cdc2AF.as:adh1T::hphMX6 TetR1 PP2AΔ::kanMX6 | This work |

312

313

314

315

316

317 **References**

- 318 1. Patterson, J. O., Rees, P. & Nurse, P. Noisy Cell-Size-Correlated Expression of Cyclin B  
319 Drives Probabilistic Cell-Size Homeostasis in Fission Yeast. *Curr. Biol.* **29**, 1379-  
320 1386.e4 (2019).
- 321 2. Coudreuse, D. & Nurse, P. Driving the cell cycle with a minimal CDK control network.  
322 *Nature* **468**, 1074–1079 (2010).
- 323 3. Solomon, M. J. *et al.* Cyclin activation of p34cdc2. *Cell* **63**, 1013–24 (1990).
- 324 4. Nurse, P. Genetic control of cell size at cell division in yeast. *Nature* **256**, 547–551  
325 (1975).
- 326 5. Russell, P. & Nurse, P. cdc25+ functions as an inducer in the mitotic control of fission  
327 yeast. *Cell* **45**, 145–153 (1986).
- 328 6. Kinoshita, N., Yamano, H., Niwa, H., Yoshida, T. & Yanagida, M. Negative regulation of  
329 mitosis by the fission yeast protein phosphatase ppa2. *Genes Dev.* **7**, 1059–71 (1993).
- 330 7. Pomerening, J. R., Sontag, E. D. & Ferrell, J. E. Building a cell cycle oscillator: hysteresis  
331 and bistability in the activation of Cdc2. *Nat. Cell Biol.* **5**, 346–351 (2003).
- 332 8. Pomerening, J. R., Kim, S. Y. & Ferrell, J. E. Systems-Level Dissection of the Cell-Cycle  
333 Oscillator: Bypassing Positive Feedback Produces Damped Oscillations. *Cell* **122**, 565–  
334 578 (2005).
- 335 9. Sha, W. *et al.* Hysteresis drives cell-cycle transitions in *Xenopus laevis* egg extracts.  
336 *Proc. Natl. Acad. Sci. U. S. A.* **100**, 975–80 (2003).
- 337 10. Mochida, S., Rata, S., Hino, H., Nagai, T. & Ela Nová, B. Two Bistable Switches Govern  
338 M Phase Entry Current Biology Report Two Bistable Switches Govern M Phase Entry.  
339 *Curr. Biol.* **26**, 3361–3367 (2016).

- 340 11. Rata, S. *et al.* Two Interlinked Bistable Switches Govern Mitotic Control in Mammalian  
341 Cells Report Two Interlinked Bistable Switches Govern Mitotic Control in Mammalian  
342 Cells. *Curr. Biol.* **28**, 3824-3832.e6 (2018).
- 343 12. Wood, E. & Nurse, P. Pom1 and cell size homeostasis in fission yeast. *Cell Cycle* **12**,  
344 3417–3425 (2013).
- 345 13. Pomerening, J. R., Ubersax, J. A., Ferrell, J. E. & Jr. Rapid cycling and precocious  
346 termination of G1 phase in cells expressing CDK1AF. *Mol. Biol. Cell* **19**, 3426–41  
347 (2008).
- 348 14. Sutani, T. *et al.* Fission yeast condensin complex: essential roles of non-SMC subunits  
349 for condensation and Cdc2 phosphorylation of Cut3/SMC4. *Genes Dev.* **13**, 2271–83  
350 (1999).
- 351 15. Spencer, S. L. *et al.* The Proliferation-Quiescence Decision Is Controlled by a  
352 Bifurcation in CDK2 Activity at Mitotic Exit. *Cell* **155**, 369–383 (2013).
- 353 16. Araujo, A. R., Gelens, L., Sheriff, R. S. M. & Santos, S. D. M. Positive Feedback Keeps  
354 Duration of Mitosis Temporally Insulated from Upstream Cell-Cycle Events. *Mol. Cell*  
355 **64**, 362–375 (2016).
- 356 17. Swaffer, M. P., Jones, A. W., Flynn, H. R., Snijders, A. P. & Nurse, P. CDK Substrate  
357 Phosphorylation and Ordering the Cell Cycle. *Cell* **167**, 1750-1761.e16 (2016).
- 358 18. Navarro, F. J. & Nurse, P. A systematic screen reveals new elements acting at the  
359 G2/M cell cycle control. *Genome Biol.* **13**, R36 (2012).
- 360 19. Patterson, J. O., Rees, P. & Nurse, P. Noisy Cell-Size-Correlated Expression of Cyclin B  
361 Drives Probabilistic Cell-Size Homeostasis in Fission Yeast. *Curr. Biol.* **29**, 1379-  
362 1386.e4 (2019).
- 363 20. Yamano, H., Tsurumi, C., Gannon, J. & Hunt, T. The role of the destruction box and its

- 364 neighbouring lysine residues in cyclin B for anaphase ubiquitin-dependent proteolysis  
365 in fission yeast: Defining the D-box receptor. *EMBO J.* **17**, 5670–5678 (1998).
- 366 21. Fantès, P. A., Grant, W. D., Pritchard, R. H., Sudbery, P. E. & Wheals, A. E. The  
367 regulation of cell size and the control of mitosis. *J Theor Biol* **50**, 213–244 (1975).
- 368 22. Wilson, E. B. *The cell in development and heredity*. 3rd ed. (MacMillan, 1925).
- 369 23. Amodeo, A. A. & Skotheim, J. M. Cell-Size Control. *Cold Spring Harb. Perspect. Biol.* **8**,  
370 a019083 (2016).
- 371 24. Prescott, D. M. Relation between cell growth and cell division III. Changes in nuclear  
372 volume and growth rate and prevention of cell division in *Amoeba proteus* resulting  
373 from cytoplasmic amputations. *Exp. Cell Res.* **11**, 94–98 (1956).
- 374 25. Devi, V. R., Guttes, E. & Guttes, S. Effects of ultraviolet light on mitosis in *Physarum*  
375 *polycephalum*. *Exp. Cell Res.* **50**, 589–598 (1968).
- 376 26. Sachsenmaier, W., Dönges, K. H. & Rupff, H. Advanced Initiation of Synchronous  
377 Mitoses in *Physarum polycephalum* Following UV-irradiation. *Zeitschrift für*  
378 *Naturforsch. - Sect. B J. Chem. Sci.* **25**, 866–871 (1970).
- 379 27. Tzur, A. *et al.* Cell growth and size homeostasis in proliferating animal cells. *Science*  
380 **325**, 167–71 (2009).
- 381 28. Moreno, S., Klar, A. & Nurse, P. [56] Molecular genetic analysis of fission yeast  
382 *Schizosaccharomyces pombe*. in 795–823 (1991). doi:10.1016/0076-6879(91)94059-L
- 383 29. Kamenz, J. *et al.* Robust Ordering of Anaphase Events by Adaptive Thresholds and  
384 Competing Degradation Pathways. *Mol. Cell* **60**, 446–459 (2015).
- 385 30. Bähler, J. *et al.* Heterologous modules for efficient and versatile PCR-based gene  
386 targeting in *Schizosaccharomyces pombe*. *Yeast* **14**, 943–951 (1998).
- 387

388 **Figures**

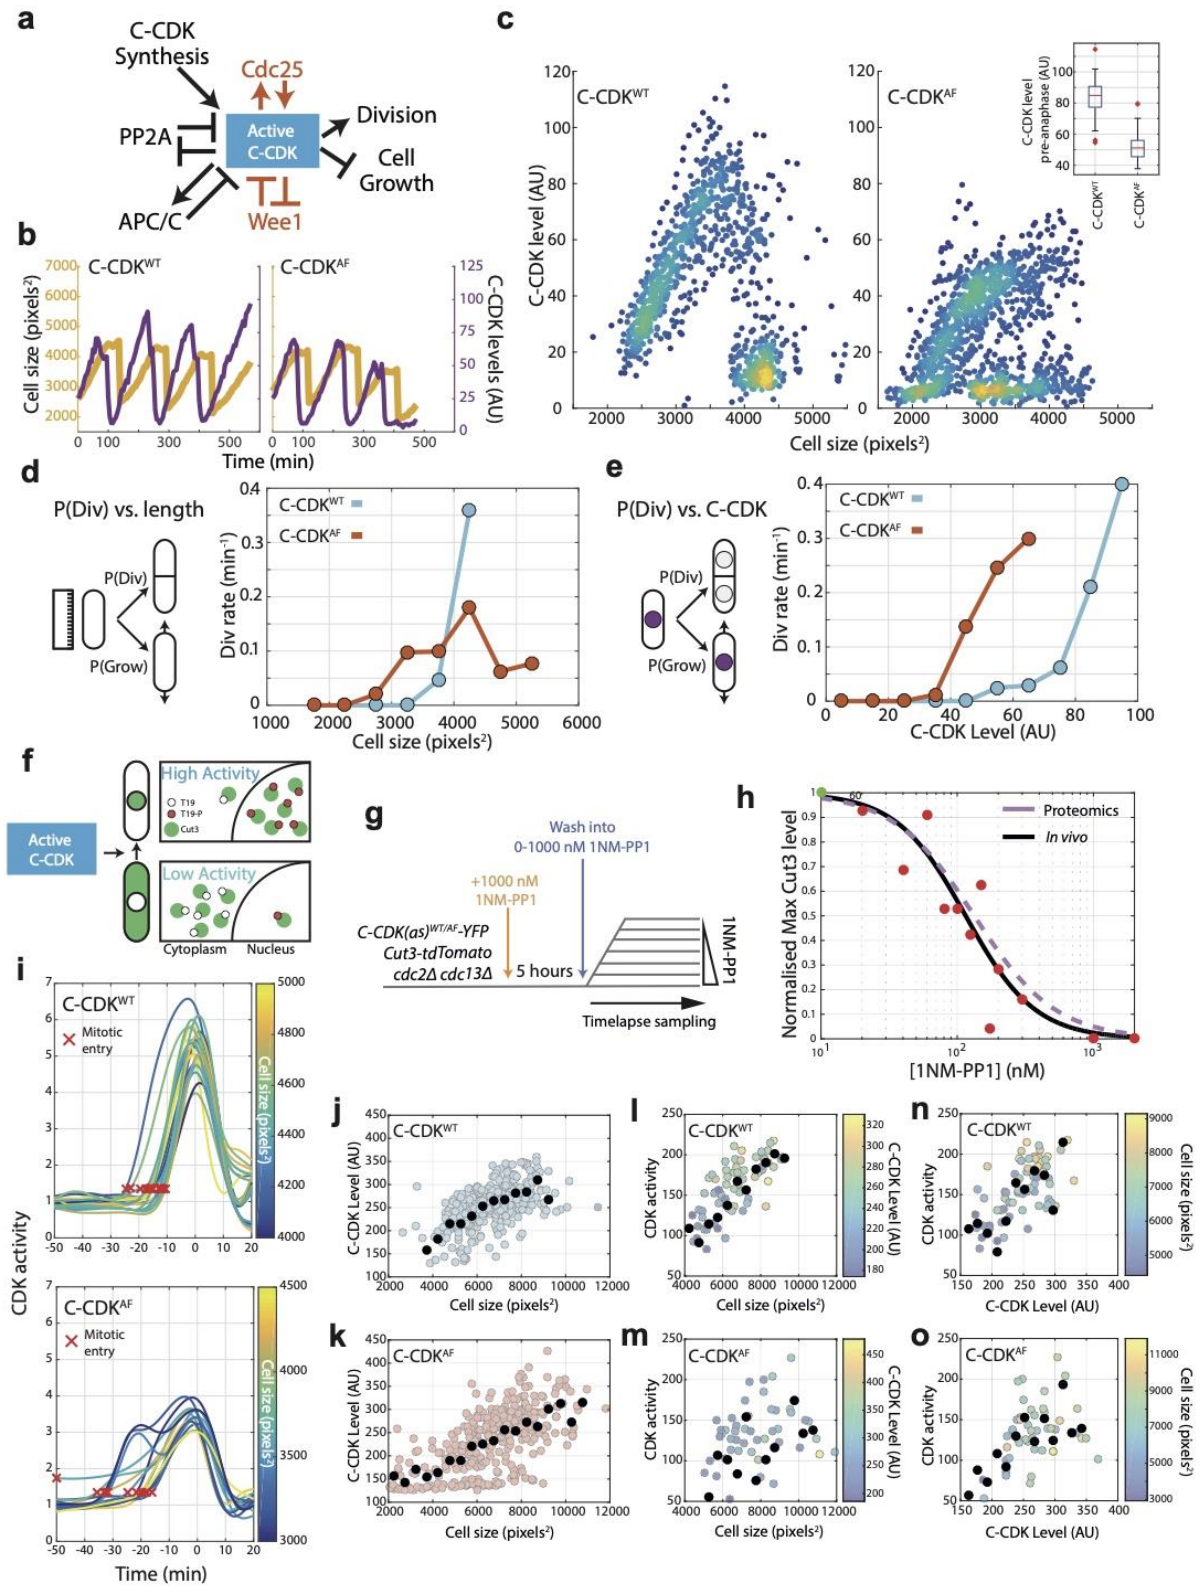



389 **Figure 1: Cell size and C-CDK concentration dictate probability of division and CDK activity**  
390 **in C-CDK<sup>WT</sup> and C-CDK<sup>AF</sup> cells**

391

392 **a** Schematic of major components influencing C-CDK activity at mitosis, and in red the  
393 pathways that do not influence C-CDK<sup>AF</sup>.

394

395 **b** Example cell lineage traces from timelapse microscopy. Cell size in pixels<sup>2</sup> is given in  
396 orange, and C-CDK fluorescence intensity is given in purple. Steep decreases in cell size  
397 traces correspond to cell division.

398

399 **c** Scatter plot of mean C-CDK level vs. cell size from timelapse microscopy data. C-CDK level  
400 is a measure of C-CDK fluorescence intensity. Colours indicate density of data. Inset boxplot  
401 is mean nuclear C-CDK concentration immediately prior to degradation at anaphase. Boxes  
402 represent IQR, with whiskers delimiting 5<sup>th</sup> to 95<sup>th</sup> percentiles. C-CDK<sup>WT</sup> n=28, C-CDK<sup>AF</sup> n=44  
403 full cycles.

404

405 **d** Plot of the probability of division at the next timepoint (P(Div)) vs cell length for CDK<sup>WT</sup>  
406 and CDK<sup>AF</sup>. Cells were followed through timelapse microscopy with measurements taken  
407 each frame. P(Div) defined as the proportion of cells that undergo C-CDK degradation at  
408 anaphase by the next timepoint, given as rate per minute. Points represent cells binned by  
409 size, with points plotted at bin centre. C-CDK<sup>WT</sup> n=685, C-CDK<sup>AF</sup> n=961 timepoints.

410

411 **e** Plot of P(Div) function vs C-CDK level for CDK<sup>WT</sup> and CDK<sup>AF</sup>. C-CDK<sup>WT</sup> n=685, C-CDK<sup>AF</sup> n=961  
412 timepoints. C-CDK intensity measurements taken every frame from timelapse microscopy,  
413 and binned by C-CDK level.

414

415 **f** Schematic of Cut3 as a CDK activity reporter. Mitotic CDK dependent phosphorylation of  
416 Cut3 on T19 results in nuclear translocation of the protein.

417

418 **g** Experimental outline of block and release timelapse experiment for panels (h),(j)-(o).  
419 Asynchronous cells possessing an analogue sensitive (as) CDK were blocked in G2 using 1  
420  $\mu$ M 1NM-PP1 for 5 hours, and then released into a range of 1NM-PP1 concentrations. Cells  
421 were then followed and monitored for their Cut3-tdTomato nuclear/cytoplasmic (N/C) ratio  
422 (C-CDK activity) and C-CDK-YFP level using fluorescence timelapse microscopy (see  
423 methods).

424

425 **h** Maximum CDK activity (normalized against maximum level, obtained by release into  
426 DMSO) against 1NM-PP1 concentration. Red points are the median of the data sets for each  
427 drug concentration (N=324), green point is median in DMSO. Black line is the Hill equation  
428 fit to the median data by a nonlinear fitting algorithm (IC50=115.4, Hill coefficient=-1.71).  
429 Purple dashed line is Hill curve derived from Swaffer *et al.* (2016) dose response data  
430 (IC50=133.4, Hill coefficient=-1.47).

431

432 **i** Timelapse quantification of CDK activity in asynchronous cells. Traces are aligned so that 0  
433 minutes corresponds to peak Cut3-tdTomato N/C ratio. Curve smoothing could move Cut3  
434 peak earlier/later than exactly 0 min. Trace colour indicates cell size. Red X indicates  
435 automatically defined mitotic entry point. C-CDK<sup>WT</sup> n=23 and C-CDK<sup>AF</sup> n=14.

436

437 **j** Scatter plot of C-CDK-YFP levels against cell size. Experiment described in (g), with  
438 measurements taken before release from 1NM-PP1 block. Black points indicate binned data,  
439 bin window size 500 pixels<sup>2</sup>. n=324.

440

441 **k** As in (j), but with C-CDK<sup>AF</sup>, n=312.

442

443 **l** Scatter plot of peak Cut3 level vs cell size. Experiment described in (g), with measurements  
444 taken after release from 1NM-PP1 block into DMSO. Black points indicate binned data, bin  
445 window size 500 pixels<sup>2</sup>. Points are coloured by YFP C-CDK levels at release. n=83. R<sup>2</sup> =  
446 0.5040.

447

448 **m** As in (l), but with C-CDK<sup>AF</sup>, n=81. R<sup>2</sup> = 0.2150.

449

450 **n** Scatter plot of peak Cut3 level vs. C-CDK level after release from 1NM-PP1 block into  
451 DMSO. Black points indicate binned data, bin window size 15 AU. Points are coloured by cell  
452 size at release. n=83. R<sup>2</sup> = 0.3668.

453

454 **o** As in (n), but with C-CDK<sup>AF</sup>, n=81. R<sup>2</sup> = 0.5501.

455

456

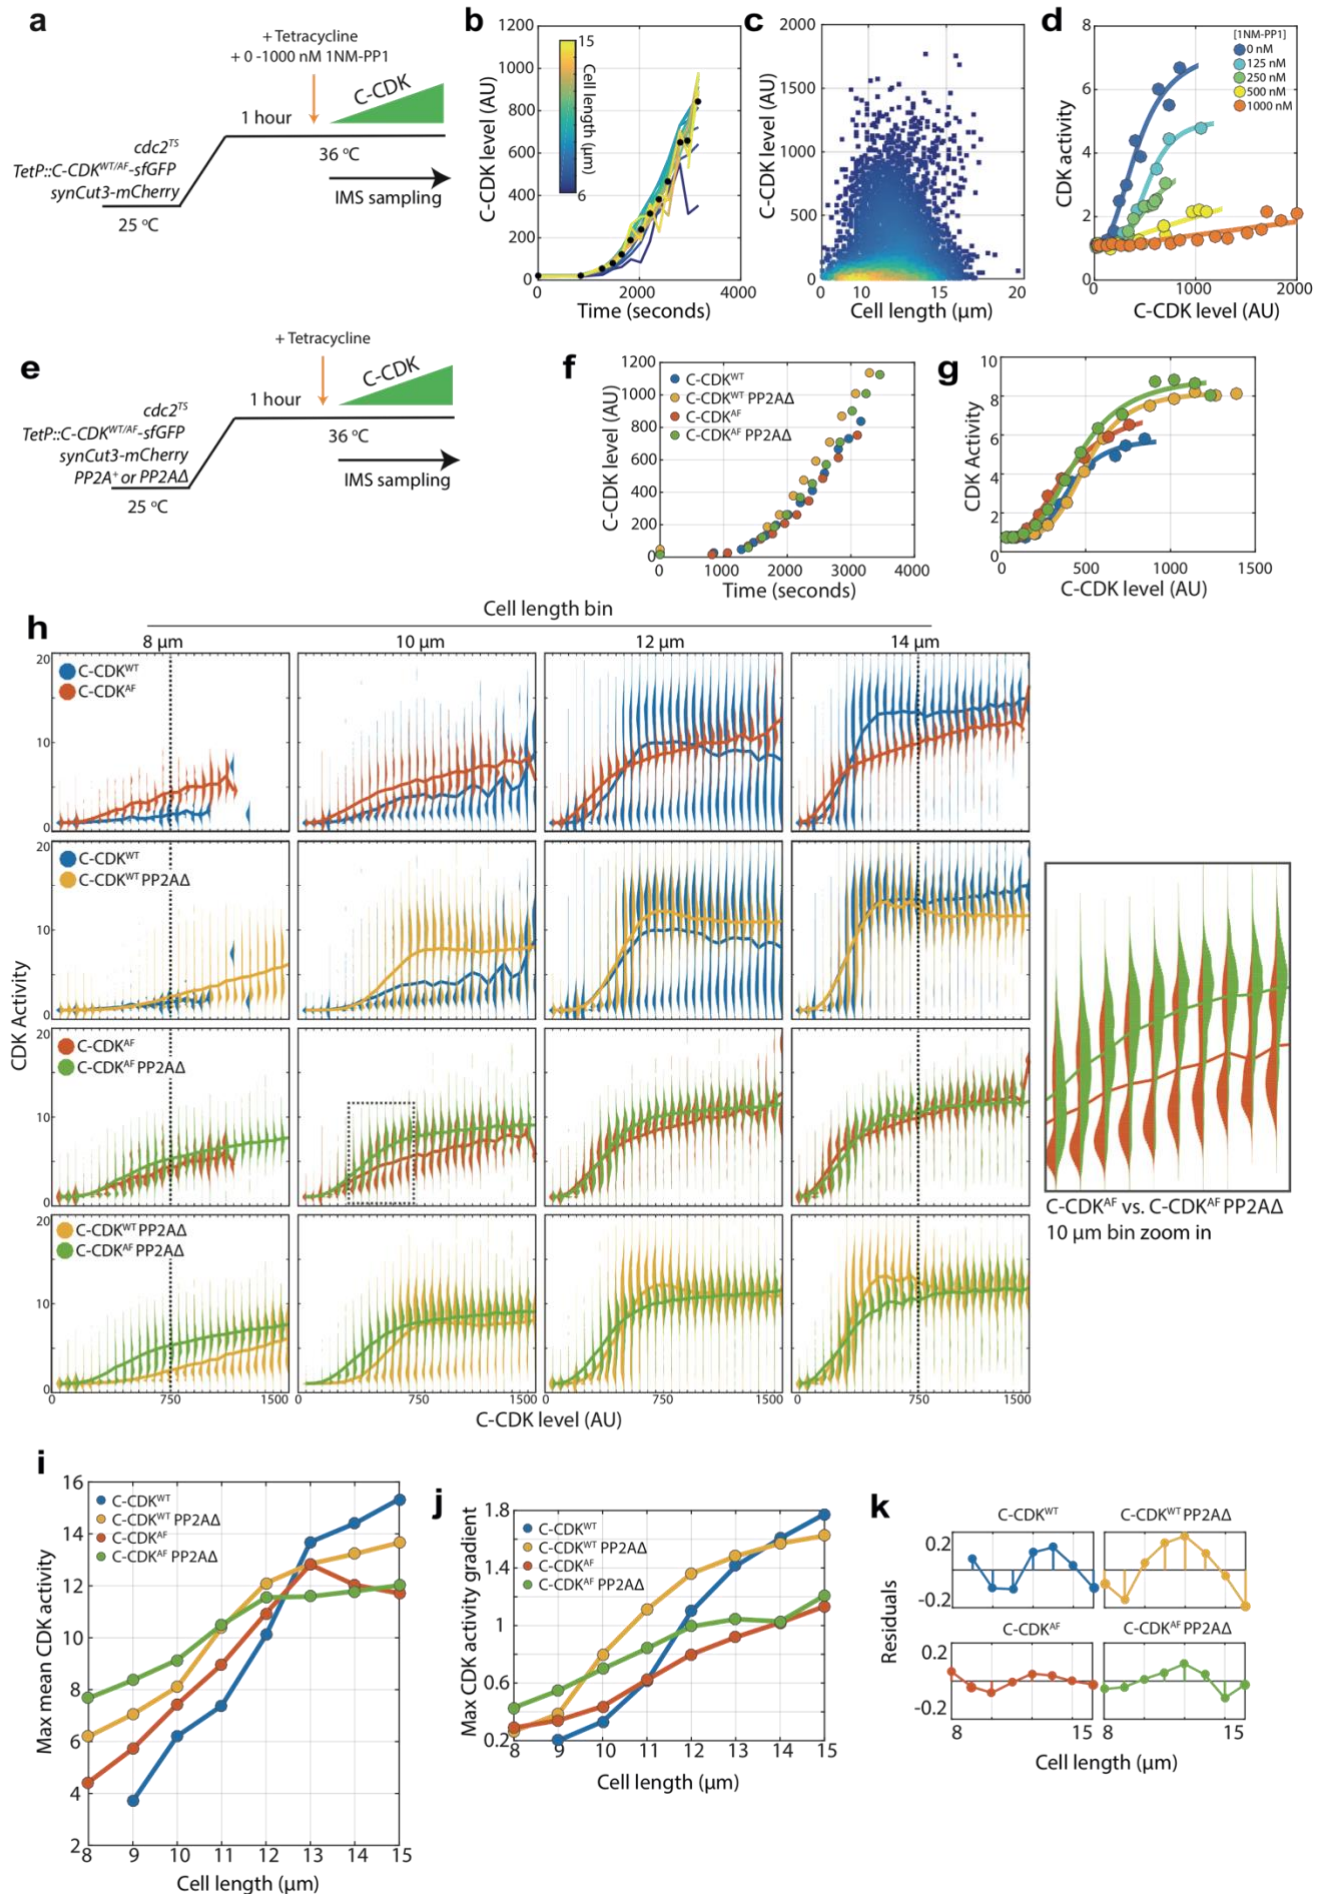

457 **Figure 2: Cell size is able to modulate CDK activity independently of canonical CDK**  
458 **regulation**

459

460 **a** Experimental outline for figure for panels (b)-(d). Cells were held at 36°C for 1 hour to  
461 ablate the function of the temperature sensitive (TS) *cdc2* allele. C-CDK-sfGFP expression  
462 was induced by addition of tetracycline, and ectopic C-CDK concentration and CDK activity  
463 were measured by sequential sampling during induction. Induced C-CDK lacks its degron box  
464 sequence, and therefore is not degraded at anaphase. Sequential sampling during C-CDK  
465 induction begins at the point of tetracycline addition, with roughly one sample taken every  
466 3 minutes after the start of C-CDK production. Sampling is conducted using an imaging flow  
467 cytometer (IMS).

468

469 **b** Expression of C-CDK<sup>WT</sup> from point of tetracycline addition. Different coloured lines  
470 represent different size bins. Black dots represent mean C-CDK level over all size bins for  
471 given timepoint. After lag period of ~1000 seconds after tetracycline addition, samples are  
472 taken roughly every 3 minutes. n=759633.

473

474 **c** Scatter plot of cell length vs. C-CDK levels. Coloured by density of data points. Data  
475 collected throughout induction. n=759633.

476

477 **d** Mean CDK activity dose response against C-CDK in the presence of annotated levels 1NM-  
478 PP1. Circles represent average CDK activities across all cells from a single sample taken after  
479 induction. 0 nM n=166081, 125 nM n=60759, 250 nM n=165128, 500 nM n=135670 and  
480 1000 nM n=231995.

481

482 **e** Experimental outline for panels (f)-(k). Cells were held at 36°C for 1 hour to ablate *cdc2<sup>TS</sup>*  
483 function. After 1 hour, C-CDK<sup>WT</sup> or C-CDK<sup>AF</sup> was induced with tetracycline in cells with either  
484 PP2A deleted or present. Induced C-CDK lacks its degron box sequence, and therefore is not  
485 degraded at anaphase. Sequential sampling during C-CDK induction begins at the point of  
486 tetracycline addition, with timepoints taken roughly every 3 minutes after 1000 second lag  
487 period in C-CDK induction.

488

489 **f** Induction of C-CDK after tetracycline addition. Points represent mean concentration of C-  
490 CDK across all size bins at indicated time points. CDK<sup>WT</sup> n=166081. C-CDK<sup>WT</sup> PP2AΔ  
491 n=175247. C-CDK<sup>AF</sup> n=177292. C-CDK<sup>AF</sup> PP2AΔ n=174847.

492

493 **g** C-CDK activity against C-CDK level in given genetic backgrounds defined in (f). Points  
494 represent mean C-CDK activity of all cells. Data is pooled from experiment in (e), from all  
495 time points following tetracycline induction. Key is the same as (f).

496

497 **h** Violin plots of single cell C-CDK level against CDK activity in annotated size bins and strain  
498 backgrounds. Solid line through violin plot indicates the mean CDK activity within the C-CDK  
499 level bin.

500

501 **i** Maximum mean CDK activity vs. cell length in annotated strain backgrounds. Max mean  
502 CDK activity is the maximum mean CDK activity within a C-CDK fluorescence level bin for a

503 given cell size. The mean CDK activity level across all fluorescence bins is shown by the solid  
504 line in the violin plots in panel (h).

505

506 **j** Maximum gradient of the mean lines in panel (h) plotted against cell length. Maximum  
507 gradient of change is derived from a spline fit to the mean CDK activity vs. C-CDK level trace.

508

509 **k** Linear regression lines were fit to data in (j), and residuals were plotted (actual value –  
510 predicted value). Non-linear residuals indicate bistability in CDK activation.

511

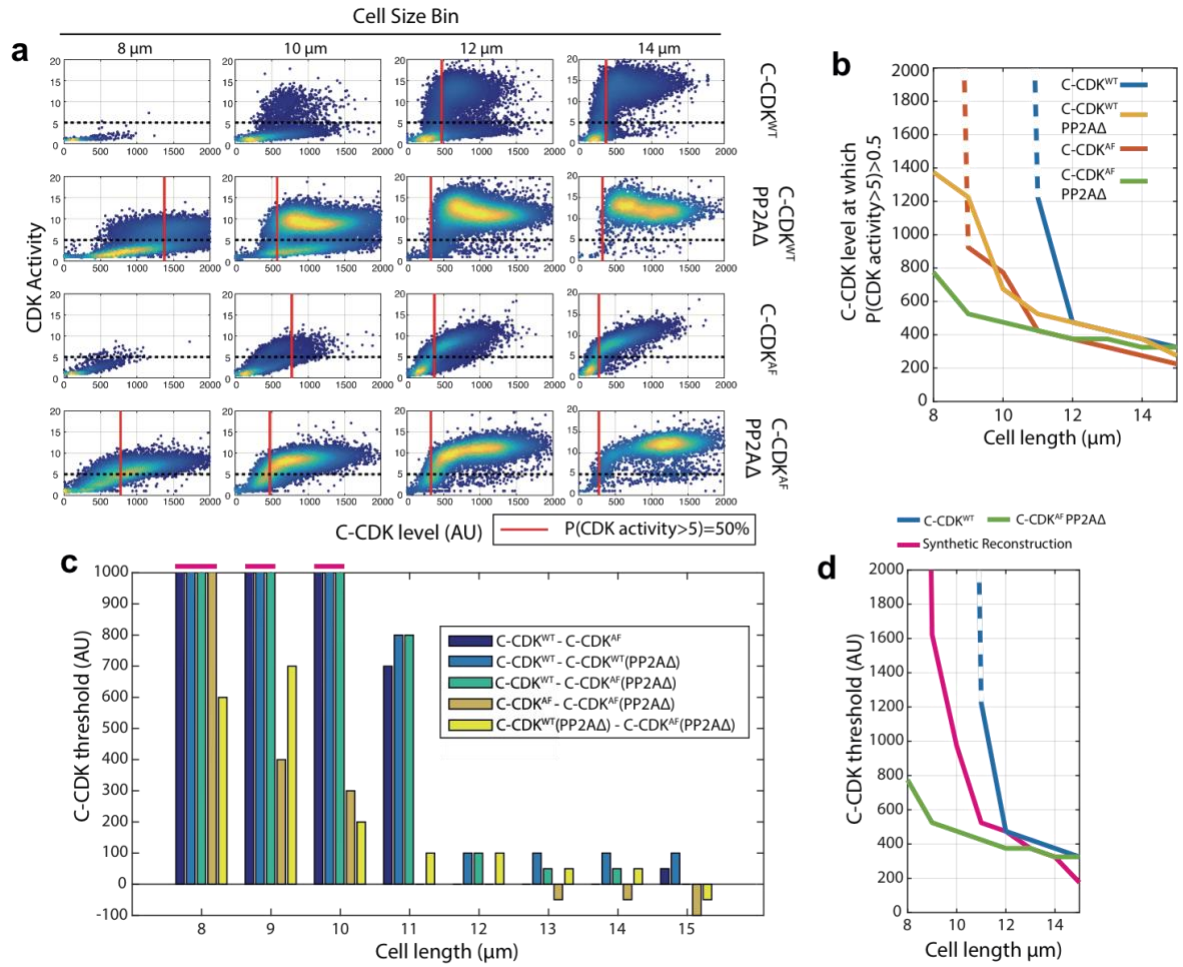

512

513

514 **Figure 3: CDK Tyrosine phosphorylation and PP2A act synergistically to restrict division in**  
515 **small cells**

516

517 **a** Scatter plots of C-CDK level against CDK activity. Either C-CDK<sup>WT</sup> or C-CDK<sup>AF</sup> was induced in  
518 backgrounds with PP2A either lacking or present. Red line indicates the C-CDK level at which  
519 50% of cells have a CDK activity greater than 5. Black dashed line marks CDK activity of 5.  
520 Data taken from Fig. 2h.

521

522 **b** C-CDK level at which 50% of cells have C-CDK activity > 5. Data is taken from (a) across all  
523 size bins. Y-axis represents the C-CDK threshold at which 50% of cells will have a C-CDK  
524 activity of 5. Dashed lines indicate values where this C-CDK threshold level is undefined due  
525 to the threshold being unattainable in experimental conditions.

526

527 **c** Piecewise dissection of the amount of C-CDK a particular component of the cell cycle  
528 network is able to prevent from switching to an 'on' state (C-CDK activity level of 5) in  
529 different size bins. Bar chart shown is of subtractions of curves described in key (from inset).  
530 For example, C-CDK<sup>WT</sup> - C-CDK<sup>AF</sup> gives the C-CDK threshold tyrosine phosphorylation alone  
531 (in a background with PP2A present) is able to generate to restrict C-CDK activation. Values  
532 that are undefined due to undefined original threshold values from (a) are taken to be 1000  
533 units, and are marked above the axis (pink).

534

535 **d** Cell length against C-CDK level threshold of annotated curves. Here, a synthetic threshold  
536 curve is built (pink), by adding the individual component regulatory contributions of CDK  
537 tyrosine phosphorylation (panel (c), yellow) and PP2A (panel (c), orange) to the base curve  
538 of C-CDK<sup>AF</sup> PP2A $\Delta$  (green) to try and re-capitulate the WT behaviour (blue). Dashed line  
539 indicates undefined threshold values.

540

541

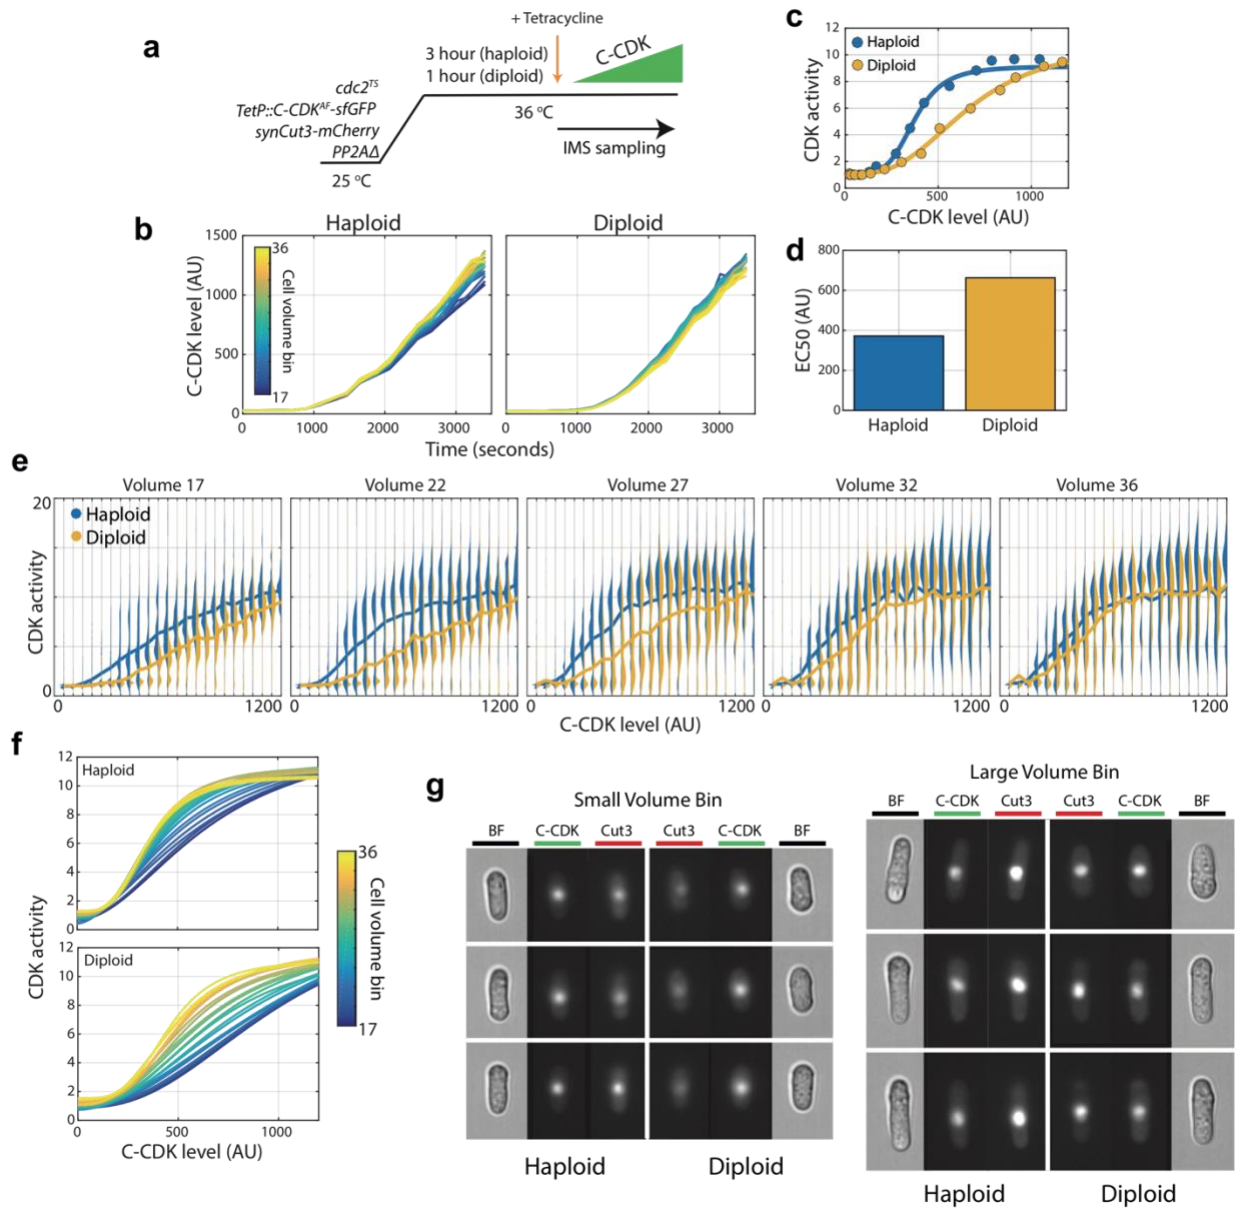

542  
 543  
 544  
 545  
 546  
 547  
 548  
 549  
 550  
 551  
 552  
 553  
 554



555 **Figure 4: Cellular DNA content inhibits CDK activity independently of tyrosine**  
556 **phosphorylation or PP2A activity**

557

558 **a** Experimental outline for panels (b)-(g). PP2A  $\Delta/\Delta$  diploids and PP2A $\Delta$  haploids were  
559 arrested using *cdc2<sup>TS</sup>*. Diploids were held at 36°C for 1 hour, whilst haploids were held for 3  
560 hours to generate blocked cell populations with similar cell volumes despite ploidy  
561 differences. C-CDK<sup>AF</sup> expression was induced by addition of tetracycline, and C-CDK  
562 concentration and CDK activity were measured by sequential sampling from time of  
563 induction in an imaging flow cytometer.

564

565 **b** Expression of C-CDK<sup>AF</sup> from point of tetracycline addition in haploid and diploid strains.  
566 Different coloured lines represent different size bins. Haploid n=125021, Diploid n=139557.

567

568 **c** Mean CDK activity against C-CDK<sup>AF</sup> level in haploids and diploids. Solid line is a sigmoid fit  
569 to data.

570

571 **d** EC50 from sigmoid curves in (c). Haploid EC50: 372 AU. Diploid EC50: 663 AU. Haploid  
572 EC50 is 56% of diploid EC50.

573

574 **e** Violin plots of single cell C-CDK<sup>AF</sup> level against CDK activity in annotated volume bins and  
575 ploidy status. Solid line through violin plot indicates the mean CDK activity within the C-CDK  
576 level bin. Volume bins span a physiological range of diploid cell sizes. Volume bin 17  
577 corresponds to a haploid cell length of 12.1  $\mu\text{m}$  and a diploid cell length of 9.53  $\mu\text{m}$ . Volume  
578 bin 36 corresponds to a haploid length of 18.7  $\mu\text{m}$  and a diploid length of 14.4  $\mu\text{m}$ .

579

580 **f** Mean intra volume-bin dose response of C-CDK level vs. CDK activity in annotated ploidy  
581 level. Lines are sigmoid curves fit to raw data. Cell volume bin indicated by line colour.

582

583 **g** Example raw images from experiment. Brightfield (BF) channel displaying cell morphology,  
584 C-CDK-sfGFP channel and synCut3-mCherry CDK activity indicator are shown. C-CDK level is  
585 the same across all images.

586

587 **Supplementary Figures**

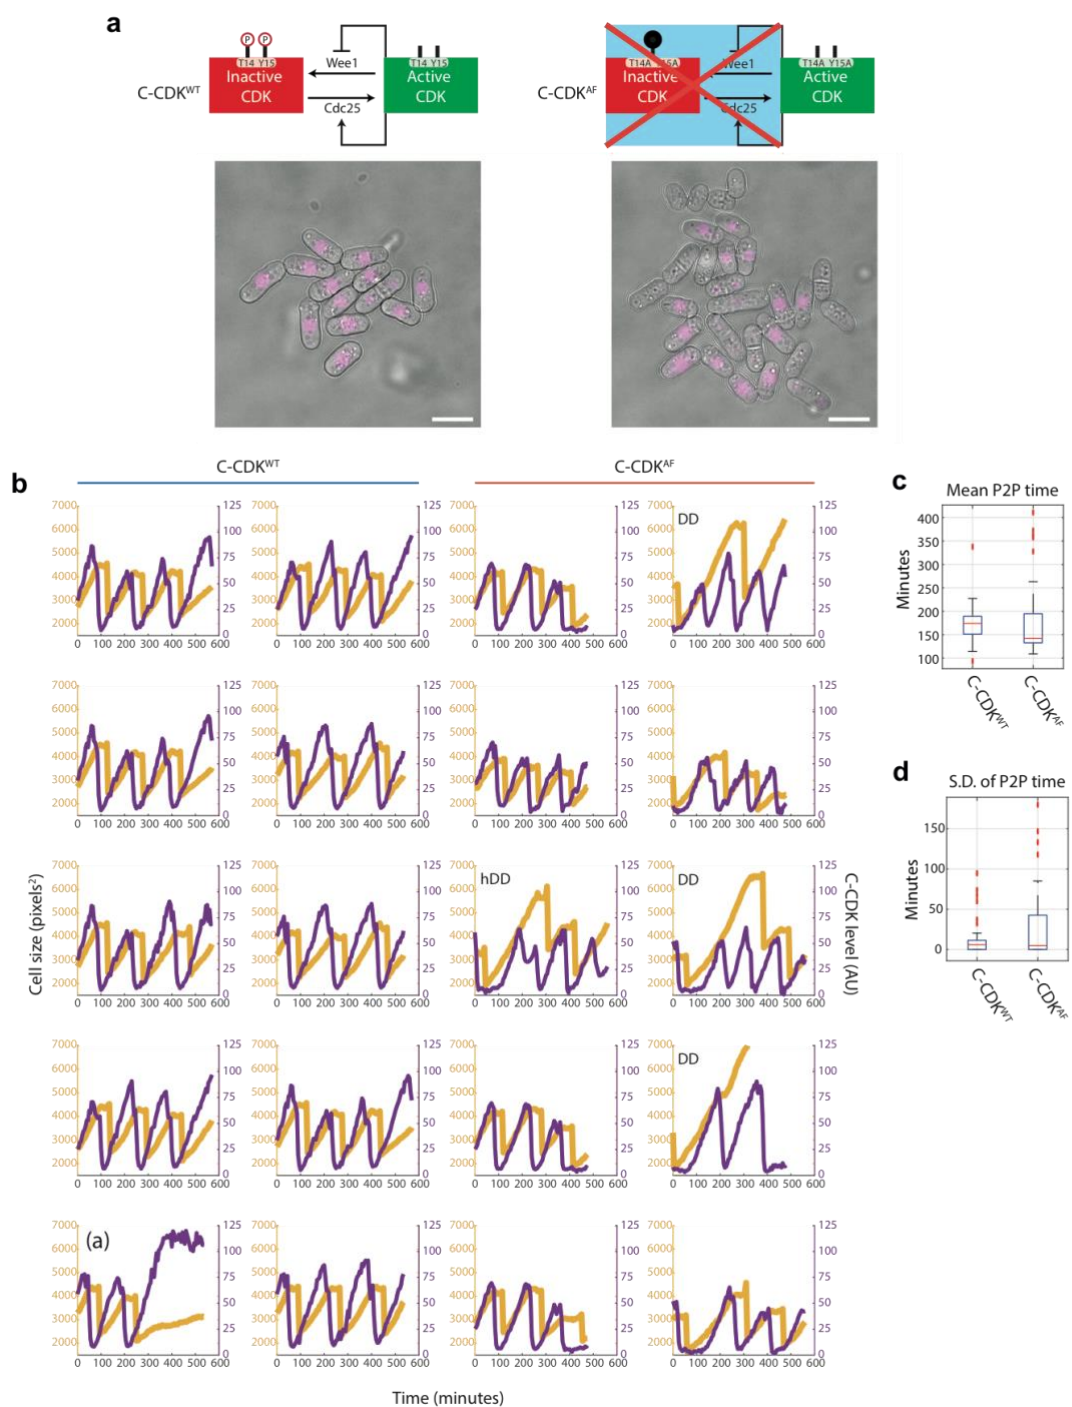

588  
589  
590  
591  
592  
593  
594  
595

596 **Supplementary Figure 1: Fluorescence time-lapse quantification of C-CDK dynamics in**  
597 **unperturbed cell cycles**

598

599 **a** Schematics of C-CDK<sup>WT</sup> and C-CDK<sup>AF</sup> regulation by Wee1 kinase and Cdc25 phosphatase. C-  
600 CDK<sup>AF</sup> has T14 mutated to A and Y15 mutated to F to mimic constitutive dephosphorylation  
601 of both residues. Example images of a FOV from time-lapse movie is shown. Cells were  
602 grown in a Cellasics microfluidics plate following 2 days of culture in YE4S at 32 °C. C-CDK-  
603 YFP is seen in purple. Scale bar=10 μm.

604

605 **b** Purple lines indicate C-CDK levels (mean nuclear concentration) and yellow indicates cell  
606 size (measured by cell mask area in pixels<sup>2</sup>). Cell mask and lineage tracing generated by  
607 Pomseg and Pomtrack (see methods). DD=Double dip cell, hDD=half double dip cell. DD cells  
608 undergo complete cyclin degradation without cell division. hDD cells undergo incomplete  
609 cyclin degradation without division. Trace marked (a) represents an aberrant cycle in a C-  
610 CDK<sup>WT</sup> expressing cell.

611

612 **c** Boxplot of C-CDK oscillation period. Period was calculated by measuring the peak to peak  
613 (P2P) distance on the autocorrelation function of each C-CDK level lineage trace. C-CDK<sup>WT</sup>,  
614 N=32; C-CDK<sup>AF</sup>, N=57. Box represents median value delimited by 25<sup>th</sup> and 75<sup>th</sup> percentiles.  
615 See methods for outlier points.

616

617 **d** Boxplot of intra-lineage standard deviation of period length. C-CDK<sup>WT</sup>, N=32; C-CDK<sup>AF</sup>,  
618 N=57. Box represents median value delimited by 25<sup>th</sup> and 75<sup>th</sup> percentiles. See methods for  
619 outlier points.

620

621

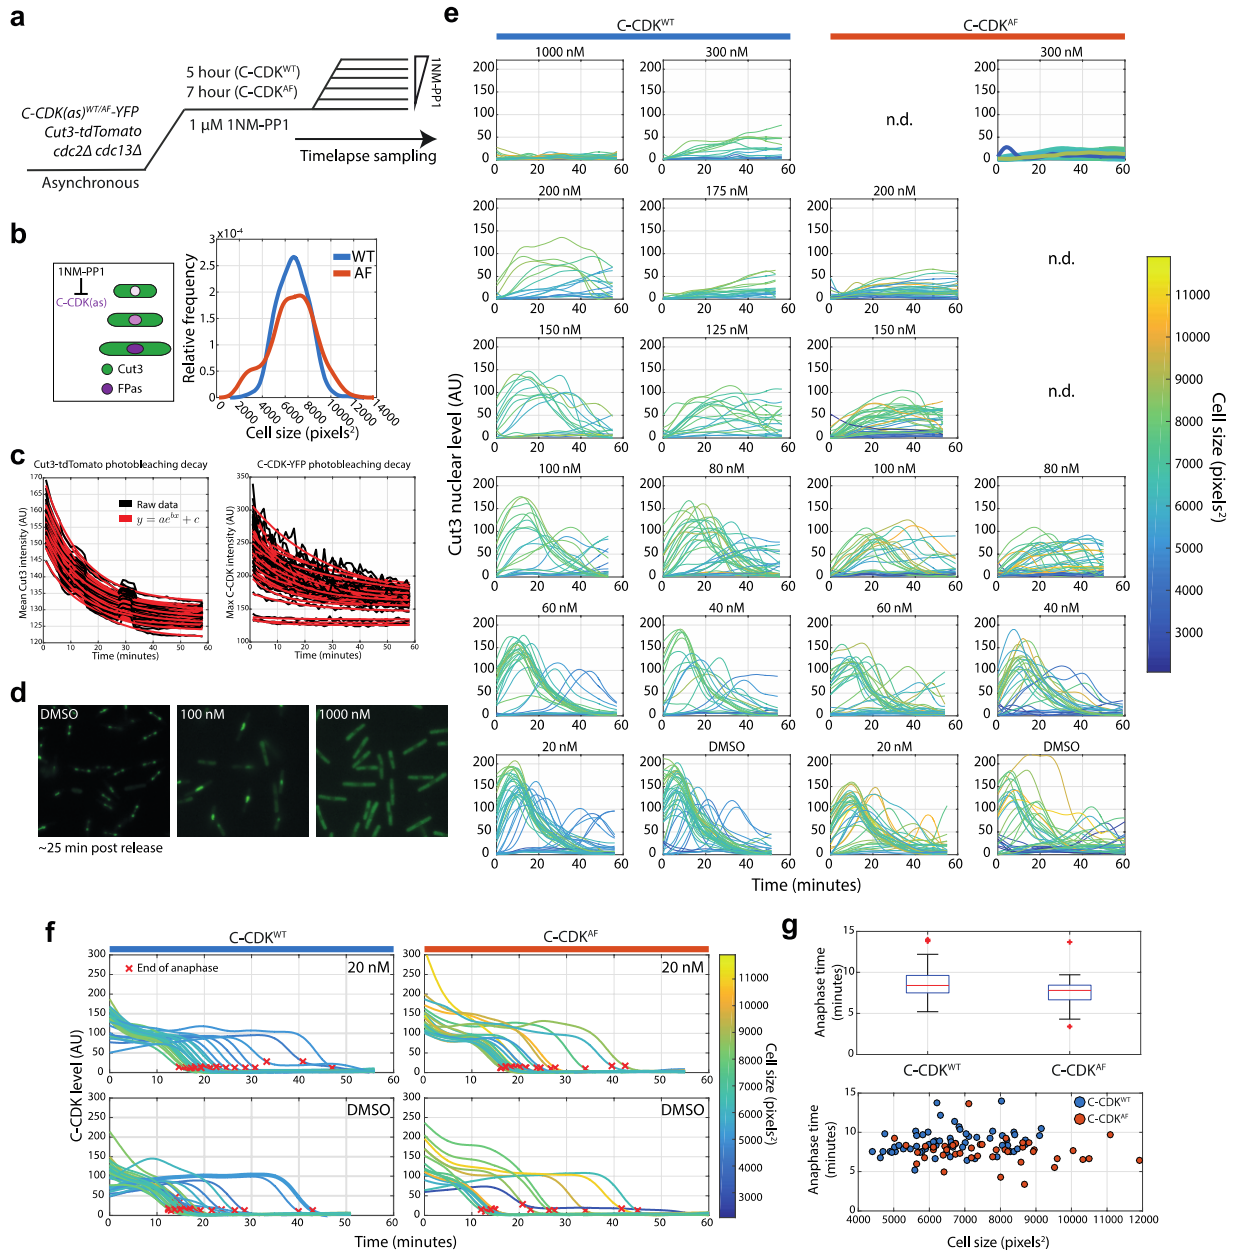

622  
623  
624  
625  
626  
627  
628  
629  
630  
631  
632  
633  
634

635 **Supplementary Figure 2: A time-lapse block and release assay to measure the effect of**  
636 **CDK inhibition on CDK activity in single cells**

637

638 **a** Experimental outline for panels B-G. 1NM-PP1 sensitive C-CDK<sup>WT</sup> and C-CDK<sup>WT</sup> cells are  
639 blocked by addition of 1NM-PP1. C-CDK<sup>AF</sup> cells were block for longer (7 hours against 5  
640 hours) to allow cells to reach a similar size distribution as C-CDK<sup>WT</sup> cells. Cells were then  
641 released into a range of 1NM-PP1 concentrations. After release, images were acquired  
642 every minute. Time between washing and image acquisition is ~5 minutes. Cells were grown  
643 in EMM at 32°C.

644

645 **b** Left: Schematic demonstrating that as cells are blocked at G2/M, they continue to grow  
646 and accumulate C-CDK but do not translocate Cut3 into the nucleus or alter their levels of  
647 Cut3. Right: Density plot demonstrates the overlap population cell lengths of C-CDK<sup>WT</sup> and  
648 C-CDK<sup>WT</sup> cells after variable block times.

649

650 **c** Black traces indicate raw data. Red traces indicate exponential curve fit to data.  
651 Photobleaching curves were derived from the 1000 nM release using C-CDK<sup>WT</sup>-YFP and Cut3-  
652 tdTomato. All subsequent measurements were corrected for photobleaching from derived  
653 curves.

654

655 **d** Images of Cut3-GFP channel from representative FoV ~25 minutes after release from a 1  
656  $\mu$ M block into indicated drug concentrations.

657

658 **e** Plots of nuclear Cut3-GFP levels against time after release over a range of 1NM-PP1  
659 concentrations. Lines are coloured by cell size at T=0 of the release.

660

661 **f** Single cell C-CDK-YFP traces in DMSO and 20 nM of release. Red x indicates end of  
662 anaphase. Traces are coloured by cell size at Time=0. Only traces which undergo anaphase  
663 are shown. End of anaphase defined as first time-point at which C-CDK-YFP trace is equal to  
664 post anaphase YFP plateau level +10 AU.

665

666 **g** Boxplot of anaphase time in WT and AF strains. Anaphase time is calculated as end of  
667 anaphase time – peak Cut3 time. Difference is non-significant. C-CDK<sup>WT</sup>, N=69 and C-CDK<sup>AF</sup>,  
668 N=47. Lower panel, scatter plot of anaphase time vs cell size, with strain indicated by colour.  
669 Box represents median value delimited by 25<sup>th</sup> and 75<sup>th</sup> percentiles. See methods for outlier  
670 points.

671

672

673

674

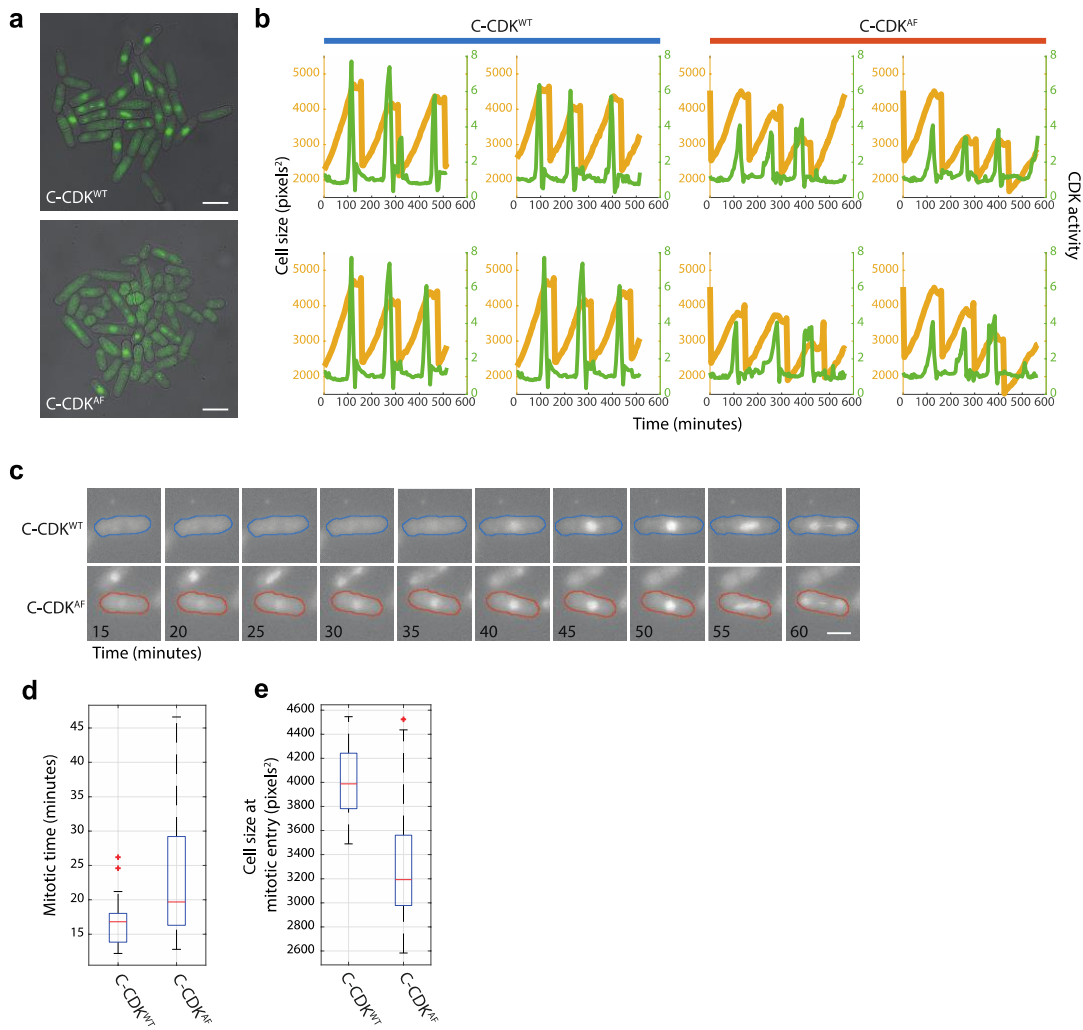

675  
676  
677  
678  
679  
680  
681  
682  
683  
684  
685  
686  
687  
688  
689  
690  
691  
692  
693

694 **Supplementary Figure 3: Cut3-GFP as a marker of CDK activity in WT and AF cell strains**

695 **a** Still images of Cut3-GFP tagged in strains expressing C-CDK<sup>WT</sup> and C-CDK<sup>AF</sup>. Cells were  
696 grown in a Cellasics microfluidics device in YE4S at 32°C. Scale bar=10 µm.

697

698 **b** Example cell length and Cut3-GFP single cell lineages. Quantification is performed by  
699 Pomseg and Pomtrack (see methods). Cut3-GFP nuclear/cytoplasmic (N/C) ratio is  
700 calculated by dividing mean cytoplasmic Cut3 intensity by mean nuclear Cut3 intensity after  
701 background subtraction. Orange lines= cell size, green lines= CDK activity (measured by Cut3  
702 N/C ratio).

703

704 **c** Montage of tagged C-CDK<sup>WT</sup> and C-CDK<sup>AF</sup> strains from time-lapse. Colour outline indicates  
705 strain and is derived from Pomseg based segmentation of the brightfield image. Scale bar=5  
706 µm.

707

708 **d** Boxplot of mitotic times in C-CDK<sup>WT</sup> and C-CDK<sup>AF</sup> strains. Mitotic time is calculated as peak  
709 time – mitotic entry time. Difference is significant by two sample t-test (p=0.006). Box  
710 represents median value delimited by 25<sup>th</sup> and 75<sup>th</sup> percentiles. See methods for outlier  
711 points.

712

713 **e** Boxplot of cell size at mitotic entry (cell size sampled at red x position in **Fig. 1i**). Note high  
714 variability in the C-CDK<sup>AF</sup> population (CoV=0.18 vs 0.08 in WT). Box represents median value  
715 delimited by 25<sup>th</sup> and 75<sup>th</sup> percentiles. See methods for outlier points.

716

717

718

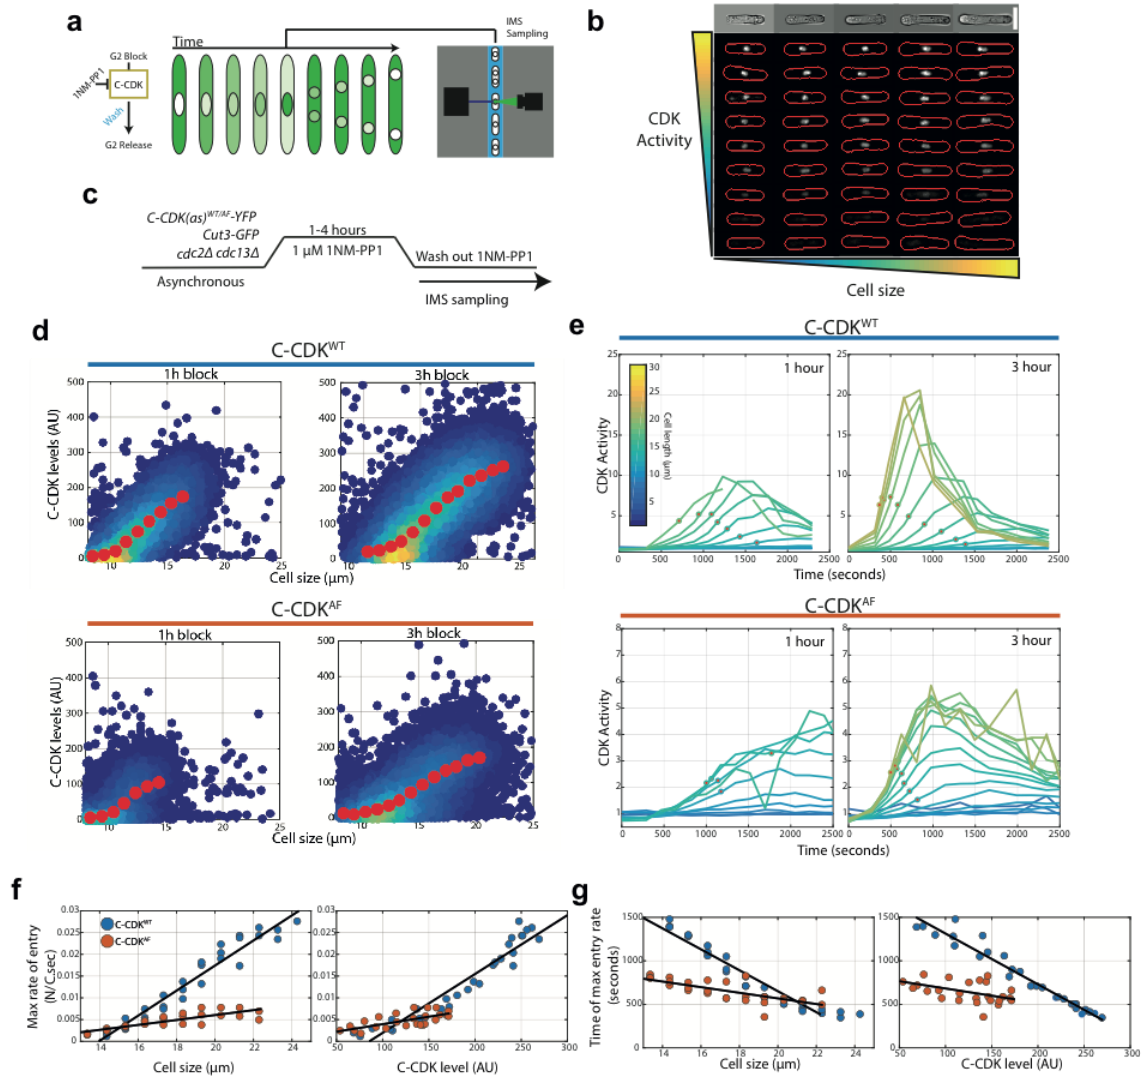

719  
720  
721  
722  
723  
724  
725  
726  
727  
728  
729  
730  
731  
732  
733



734 **Supplementary Figure 4: An imaging flow cytometry assay reveals that size, C-CDK level**  
735 **and tyrosine phosphorylation dictate the rate and timing of CDK activation at mitosis**

736

737 **a** Schematic of the high-throughput imaging flow cytometry block and release assay. Cells  
738 are arrested in G2 using 1NM-PP1 for various lengths of time, before being washed of 1NM-  
739 PP1 and sampled on an imaging flow cytometer.

740

741 **b** Representative images of single cells with computed cell masks overlaid on fluorescent  
742 Cut3 images in red. Top row of images is from the brightfield channel of the top row of  
743 fluorescent images. Representative images taken from Cut3-GFP cells in EMM at 32°C. Scale  
744 bar = 10  $\mu\text{m}$ .

745

746 **c** Experimental outline for panels (D-G). C-CDK<sup>WT/AF</sup> cells sensitive to the CDK inhibitor 1NM-  
747 PP1 are blocked for variable amounts of time. Cells are then washed of 1NM-PP1 and  
748 released into mitosis. After release, cells are monitored via sequential sampling using  
749 imaging flow cytometry. Block performed using 1  $\mu\text{M}$  1NM-PP1. Cells were grown in EMM at  
750 32°C.

751

752 **d** Quantification of C-CDK-YFP levels after indicated block time. Colours indicate density of  
753 data; yellow represents high density. Red data points indicate mean of binned data, bin  
754 widths 0.33  $\mu\text{m}$ .

755

756 **e** Plots of mean CDK activity (as measured by Cut3 N/C ratio) within size bins indicated by  
757 line colours. Red dots indicate points of maximum Cut3 N/C ratio change, as derived from  
758 the first derivative of a smoothing spline fit to raw data (raw data is shown). Each point on  
759 line has >50 cells. N=3000-12000 per time point, with ~400,000 single cell images analysed  
760 in total. Background subtraction for N/C ratio performed using wild-type cells lacking Cut3-  
761 GFP after indicated block time.

762

763 **f** Maximum Cut3 N/C ratio change against cell size or C-CDK level. C-CDK level is predicted  
764 from data in **d**. Data is taken from 2,3 and 4 hour releases. Black line represents linear  
765 regression line.

766

767 **g** Time of maximum Cut3 N/C ratio change against cell size or C-CDK level. C-CDK level is  
768 predicted from data in **d**. Data is taken from 2,3 and 4 hour releases. Black line is the linear  
769 regression line. Colours represent the same as panel (F).

770

771

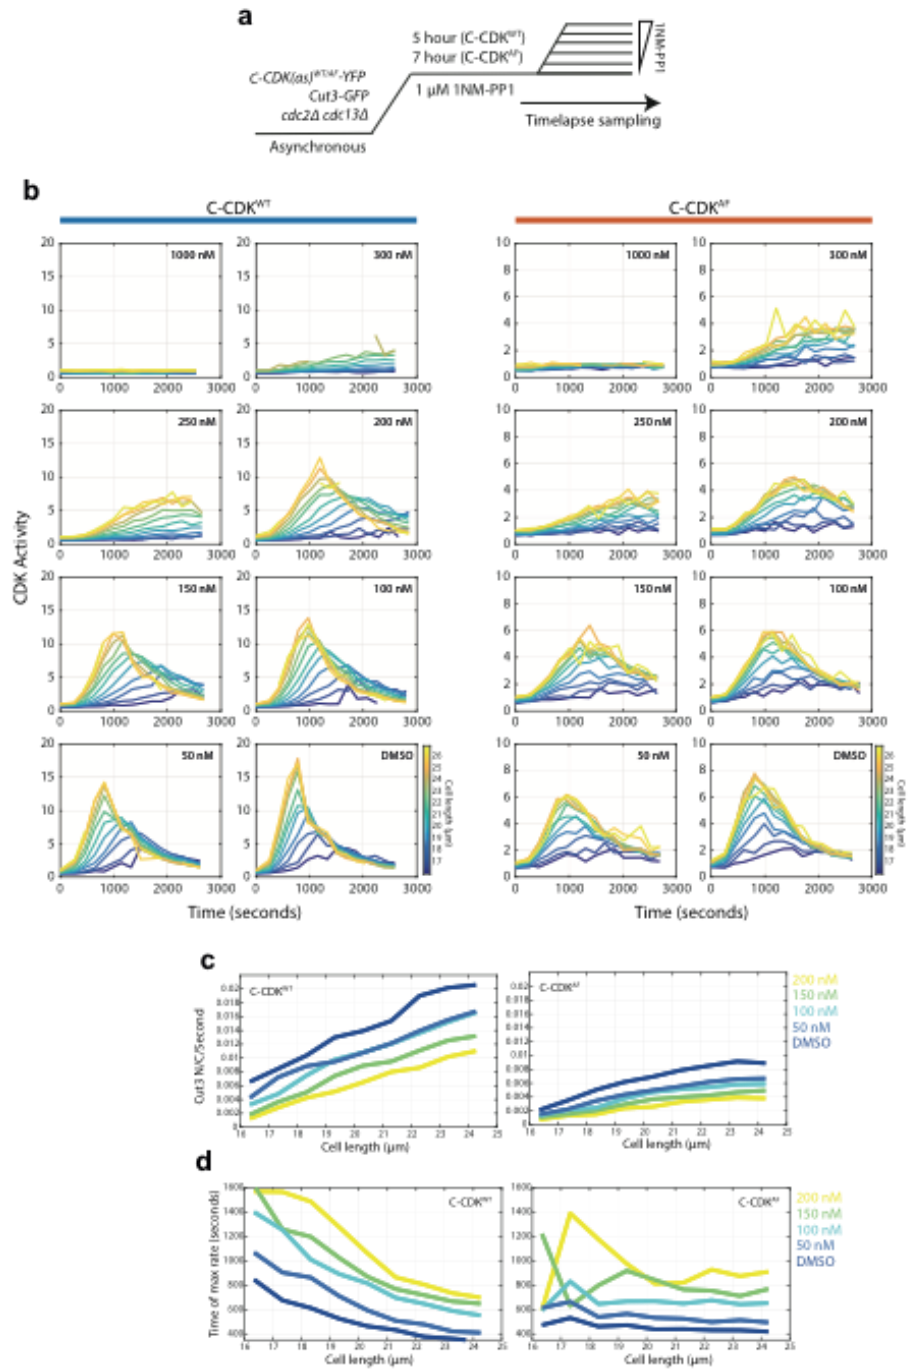

772  
 773  
 774  
 775  
 776  
 777  
 778  
 779  
 780  
 781

782 **Supplementary Figure 5: Size dependent grading of mitotic entry rates and timing are**  
783 **dose responsively dependent on CDK inhibition**

784

785 **a** Experimental outline for panels B-D. 1NM-PP1 sensitive C-CDK<sup>WT</sup> and C-CDK<sup>AF</sup> cells are  
786 blocked by addition of 1NM-PP1. C-CDK<sup>AF</sup> cells were blocked for longer (7 hours against 5  
787 hours) to allow cells to reach a similar size distribution to C-CDK<sup>WT</sup> cells. Cells were then  
788 released into a range of 1NM-PP1 concentrations. After release, images were acquired  
789 every minute. Time between washing and image acquisition is ~5 minutes. Cells were grown  
790 in EMM at 32°C. Cells are sampled during the region marked time-lapse.

791

792 **b** Plots of mean CDK activity (as measured by Cut3-GFP N/C ratio) against time from release  
793 in indicated size bins at annotated 1NM-PP1 levels. N=1000-4000 cells per time-point, >10  
794 cells averaged within each bin.

795

796 **c** Plots of maximum Cut3 nuclear translocation rates against cell size in C-CDK<sup>WT</sup> and C-CDK<sup>AF</sup>  
797 cells. Maximum rates were taken from the first derivative of a smoothing spline fit to data in

798 **b**. Line colours indicate 1NM-PP1 concentration. Key given on the right hand side.

799

800 **d** Plots of time of maximum Cut3 translocation rate timing vs cell size in WT and AF cells.  
801 Maximum rates were taken from the first derivative of a smoothing spline fit to data in **b**.  
802 Line colours indicate 1NM-PP1 concentration.

803

804

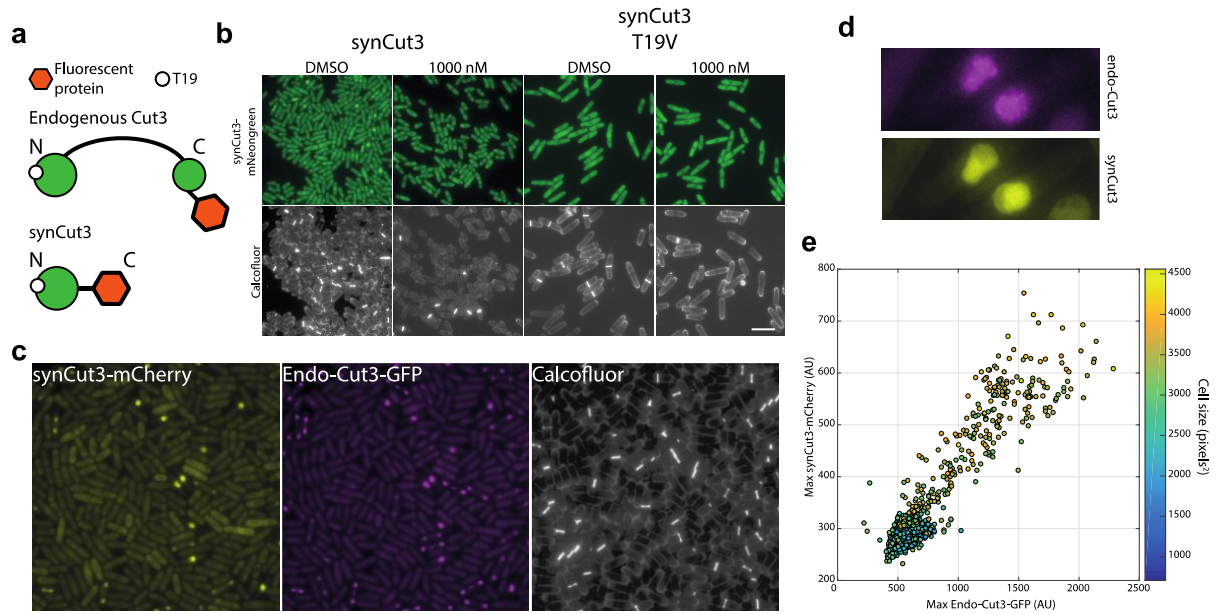

805  
806  
807  
808  
809  
810  
811  
812  
813  
814  
815  
816  
817  
818  
819  
820  
821  
822  
823  
824  
825  
826  
827  
828  
829  
830  
831  
832  
833

834 **Supplementary Figure 6: A new synthetic CDK sensor for *S. pombe***

835 **a** Design of the synthetic Cut3 (synCut3) sensor. The design includes the first 528 amino  
836 acids of Cut3 (and has previously been shown to translocate into the nucleus at mitosis<sup>1</sup>).

837

838 **b** Example images of synCut3-mNeonGreen expressed from the eno101 promoter, in the  
839 presence or absence of 1NM-PP1 (for 1 hour) or a mutated T19 residue. The T19V mutation  
840 does not allow CDK phosphorylation, therefore preventing nuclear translocation. Scale bar =  
841 20  $\mu\text{m}$ .

842

843 **c** Examples images of exogenous synCut3-mCherry and endogenous Cut3-GFP expressing  
844 cells. Scale bar = 20  $\mu\text{m}$ .

845

846 **d** Detailed view of two mitotic cells expressing both synCut3-mCherry and Cut3-GFP.

847

848 **e** Quantification of exogenous synCut3 signal vs endogenous Cut3 nuclear levels. Data  
849 points coloured to indicate cell size. Note endogenous Cut3 signal is smoothed to remove  
850 foci containing condensed chromatin regions.

851

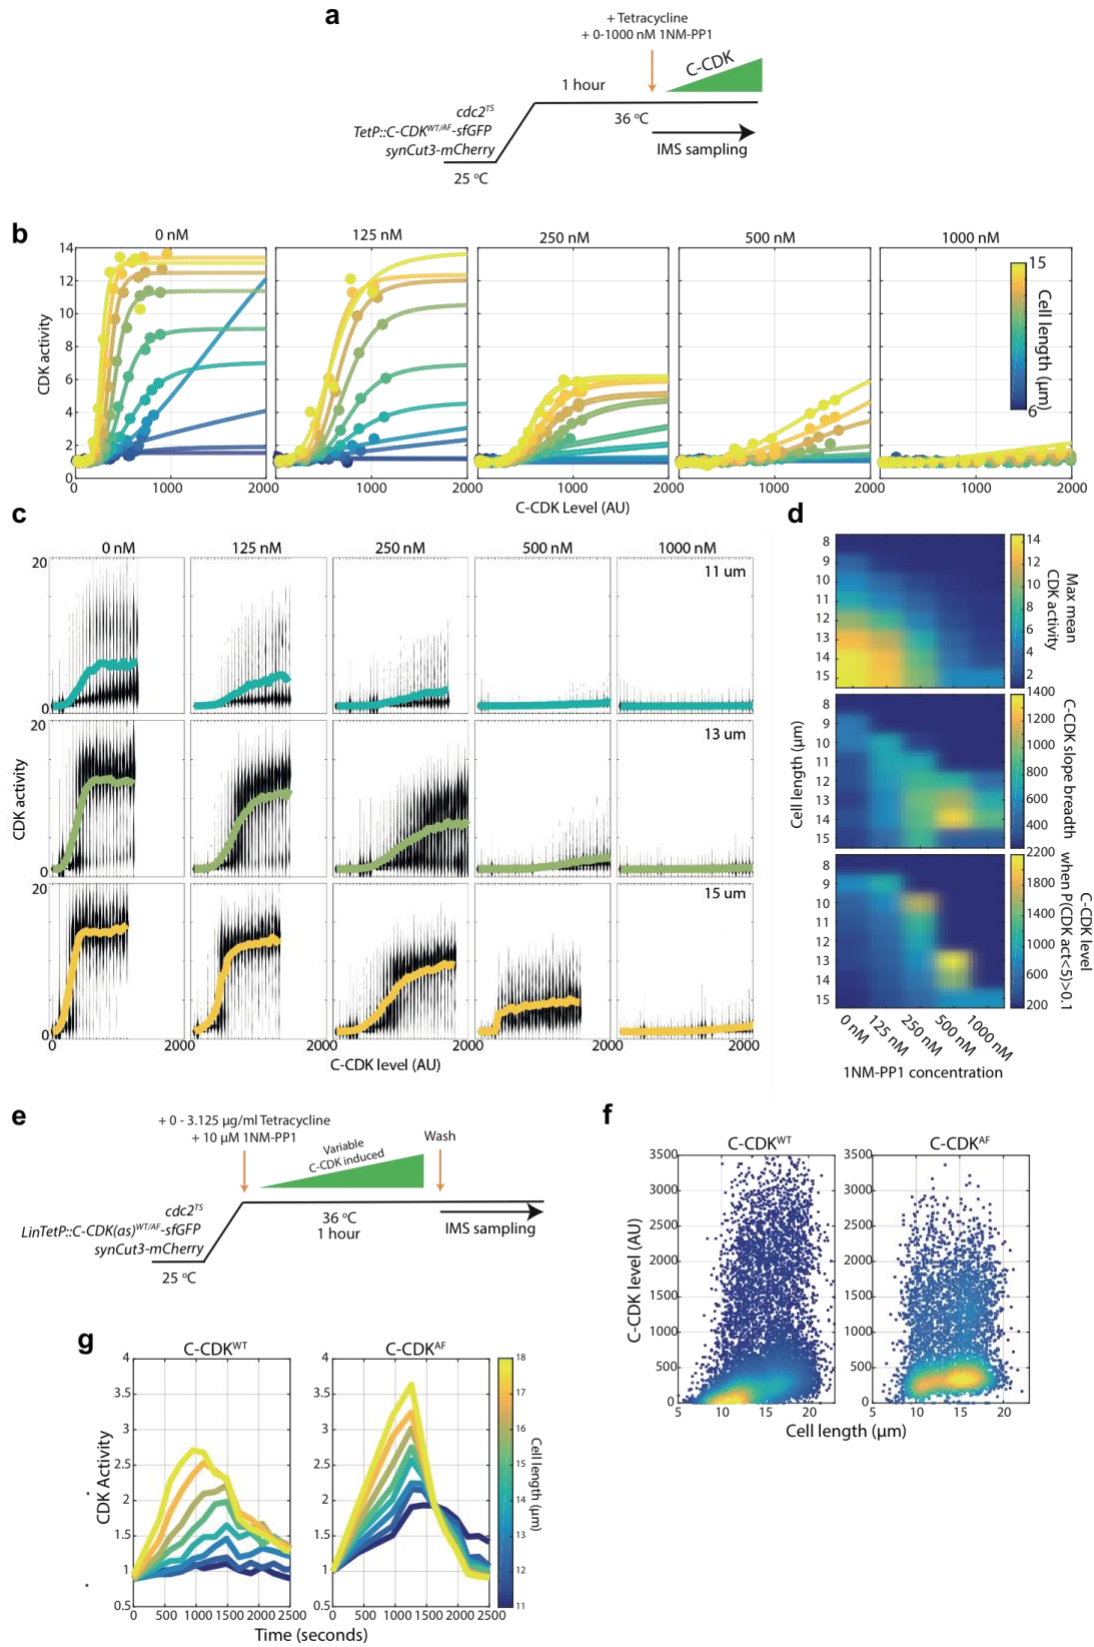

852  
853  
854  
855

856 **Supplementary Figure 7: A single cell *in vivo* biochemistry approach permits decoupling of**  
857 **cell size from C-CDK concentration**

858

859 **a** Experimental outline for panels B-D. Cells were held at 36°C for 1 hour to ablate *cdc2-M26*  
860 function. After 1 hour, C-CDK<sup>WT</sup> or C-CDK<sup>AF</sup> was induced with tetracycline. Induced C-CDK  
861 lacks its degron box sequence, and therefore is not degraded at anaphase. Sequential  
862 sampling during C-CDK induction begins at the point of tetracycline addition. Concurrent  
863 with tetracycline addition, 1NM-PP1 was added to the specified concentration to inhibit the  
864 induced C-CDK.

865

866 **b** Mean CDK activity against C-CDK level, within specified size bins. Colours within subplot  
867 indicate cell size bin (see colour bar). Different subplots represent cells released into  
868 different 1NM-PP1 concentrations.

869

870 **c** Violin plots of single cell C-CDK level against CDK activity data. Individual subplots are the  
871 single cell data from a given size bin and 1NM-PP1 level. Rows correspond to the same size  
872 bin, columns to the same 1NM-PP1 level. Although bistable behaviour is observed, lines  
873 through data represent the population mean C-CDK activity level within a given C-CDK level  
874 bin.

875

876 **d** Heatmap of annotated features, extracted from the single cell dose response data. Max  
877 mean CDK activity is the maximum mean CDK activity within a C-CDK fluorescence level bin.  
878 C-CDK slope breadth is the change in C-CDK between the C-CDK bin at which CDK activity is  
879 greater than 1.1x of minimum, and less than 0.8x of maximum. C-CDK level when  
880  $P(\text{CDK} > 5) > 0.1$  indicates the C-CDK level required to increase CDK activity in 10% of cells to a  
881 level greater than 5.

882

883 **e** Experimental outline for panels F and G. Cells were held at 36°C for 1 hour to ablate *cdc2-*  
884 *M26* function. After 1 hour, C-CDK<sup>WT</sup> or C-CDK<sup>AF</sup> was induced with tetracycline to different  
885 levels by adding variable amounts of tetracycline. C-CDK was induced in the presence of 10  
886  $\mu\text{M}$  1NM-PP1 to inhibit the induced C-CDK. After 60 minutes, 1NM-PP1 was washed from  
887 cells and cells were sequentially sampled using imaging flow cytometry (IMS). All time  
888 measurements are given as time from washing 1NM-PP1.

889

890 **f** Scatter plot of C-CDK levels against cell size after C-CDK induction. Data represent pooled  
891 data from all cells encompassing all 1NM-PP1 release concentrations Colours indicate local  
892 data point density.  $N > 10000$ .

893

894 **g** synCut3 N/C ratio (representing CDK activity) against time in the presence of induced C-  
895 CDK<sup>WT</sup> or C-CDK<sup>AF</sup>. Line colours indicate size bins.  $N > 50$  cells per data point.

896

897
